1                                   **A thalamic reticular circuit**  
2                                   **for head direction cell tuning**  
3                                   **and spatial navigation**

4  
5 **Authors:** Gil Vantomme, Zita Rovó, Romain Cardis, Elidie Béard, Georgia Katsioudi, Angelo  
6 Guadagno, Virginie Perrenoud, Laura MJ Fernandez, Anita Lüthi\*

7 \*Lead contact

8 **Affiliations:** Department of Fundamental Neurosciences, University of Lausanne, Rue du  
9 Bugnon 9, 1005 Lausanne, Vaud, Switzerland

10  
11 **Summary**

12 To navigate in space, an animal must reference external sensory landmarks to the spatial  
13 orientation of its body and head. Circuit and synaptic mechanisms that integrate external cues  
14 with internal head-direction (HD) signals to drive navigational behavior remain, however, poorly  
15 described. We identify an excitatory synaptic projection from the presubiculum and retrosplenial  
16 cortex to the anterodorsalmost sector of the thalamic reticular nucleus (TRN), so far classically  
17 implied in gating sensory information flow. Projections to TRN showed driver characteristics and  
18 involved AMPA/NMDA-type glutamate receptors that initiated TRN cell burst discharge and  
19 feedforward inhibition of anterior thalamic nuclei, where HD-tuned cells relevant for egocentric  
20 navigation reside. Chemogenetic anterodorsal TRN inhibition broadened the tuning of thalamic  
21 HD cells and compromised egocentric search strategies in the Morris water maze. Besides  
22 sensory gating, TRN-dependent thalamic inhibition is an integral part of limbic navigational circuits  
23 to recruit HD-cell-dependent search strategies during spatial navigation.

24 **Keywords:** Anterior thalamus; Retrosplenial cortex; Presubiculum; Allocentric; Egocentric;  
25 Synaptic inhibition; Burst discharge; Perseverance; Optogenetics; Chemogenetics

## 26 Introduction

27 Spatial navigation requires the ability to notice environmental landmarks, detect their sensory  
28 characteristics, and set these in relation to one's self-perceived direction, speed, and location.  
29 Cortex is a major site for spatial sensory processing and for creating internal representations of  
30 space based on one's own movement, location and body orientation to guide navigation.  
31 However, in the interest of survival, environmental cues may need to be detected rapidly to adapt  
32 navigational strategies without potentially time-consuming cortical elaboration. A major site for  
33 subcortical gating of sensory stimuli is the inhibitory thalamic reticular nucleus (TRN) that shows  
34 a unique anatomical positioning at the interface between sensory thalamic nuclei and cortex  
35 (Scheibel and Scheibel, 1966; Pinault, 2004; Crabtree, 2018). The significance of TRN in  
36 controlling sensory flow is now documented for the gain control of incoming sensory inputs (Le  
37 Masson et al., 2002), the sharpening of receptive fields (Lee et al., 1994; Soto-Sánchez et al.,  
38 2017), attentional modulation of monomodal (Halassa et al., 2014) or multimodal conflicting  
39 sensory inputs (Ahrens et al., 2015; Wimmer et al., 2015), and sensory induced escape (Dong et  
40 al., 2019).

41 In contrast to its role in sensory gating, the TRN has not been implied in the gating of internal  
42 signals that underlie one's sense of orientation in space. Lesion studies, however, suggest that  
43 TRN contributes to covertly directing a rat's self-orientation to the target stimulus, such that  
44 orienting movements can be rapidly executed (Weese et al., 1999). Moreover, anterior thalamic  
45 nuclei (ATN) are part of the brain's navigational system (Dumont and Taube, 2015), and there is  
46 anatomical evidence in rodent that anterodorsal TRN innervates ATN (Scheibel and Scheibel,  
47 1966; Gonzalo-Ruiz and Lieberman, 1995b, a; Lozsádi, 1995; Pinault and Deschênes, 1998),  
48 although this has been questioned in cat (Paré et al., 1987). The anterodorsal (AD) thalamic  
49 nucleus, part of the ATN, contains a large proportion of HD cells tuned to the direction of the  
50 rodent's head in space (Taube, 1995), which serve as an egocentric, self-centered compass  
51 during navigation (van der Meer et al., 2010; Butler et al., 2017). Although the TRN has been  
52 proposed to be part of HD circuits (Peyrache et al., 2019), the underlying functional anatomy  
53 remains elusive. Possible equivalences and differences to the canonical sensory TRN-  
54 thalamocortical circuits thus remain speculative and possible roles for TRN in the gating of HD  
55 and spatial navigation signals have not been clarified. Here, we hypothesized that if the TRN is  
56 to mediate subcortical sensory gating effectively, it should serve as an entry point for information  
57 flow to ATN to control the processing of HD signals.

58 The anterior thalamic HD representation is controlled by external visual landmarks through input  
59 from the dorsal presubiculum (dPreS) (Goodridge and Taube, 1997) and the retrosplenial cortex

60 (RSC) (Clark et al., 2010). Both areas are reciprocally connected (van Groen and Wyss, 1990)  
61 and receive afferents from ATN, primary and secondary visual cortex, integrating information  
62 relevant for egocentric and allocentric, external cue-guided, navigation (Dumont and Taube, 2015;  
63 Clark et al., 2018; Mitchell et al., 2018; Simonnet and Fricker, 2018). Behaviorally, lesion of dPreS  
64 compromises rapid orienting behaviors based on landmarks (Yoder et al., 2019), whereas RSC  
65 lesions lead to multiple deficits in spatial navigation and memory formation (Clark et al., 2018;  
66 Mitchell et al., 2018). Although there is evidence for a topographically organized cortical feedback  
67 from RSC to rat and monkey anterodorsal TRN (Cornwall et al., 1990; Lozsádi, 1994; Zikopoulos  
68 and Barbas, 2007), the nature of this cortico-thalamic communication has never been  
69 characterized. Indeed, current models of HD circuits involving ATN, dPreS and RSC (Dumont  
70 and Taube, 2015; Peyrache et al., 2017; Simonnet and Fricker, 2018; Perry and Mitchell, 2019)  
71 and of the brain's 'limbic' navigational system (Bubb et al., 2017) largely disregard a functionally  
72 integrated TRN. In spite of this gap of knowledge, the notion of a limbic anterior TRN has been  
73 proposed recently (Zikopoulos and Barbas, 2012; Halassa et al., 2014).

74 In this study, we combined tracing techniques, *in vitro* and *in vivo* electrophysiological recordings  
75 together with a spatial navigation task to probe the synaptic integration and the function of TRN  
76 in the communication between PreS, RSC and ATN.

77

## 78 **Results**

### 79 **RSC and PreS send topographically organized projections to ATN and TRN**

80 To determine afferent projection to the anterodorsal portion of the TRN, we injected small volumes  
81 (50-100 nl) of red retrobeads into anterodorsal TRN of C57BL6/J mice (4-8-week-old) and  
82 identified sites of red punctate fluorescent labeling 5 – 7 days later. Five out of 19 injections were  
83 restricted to the anterior TRN in its dorsalmost portion, as verified by parvalbumin (PV)-  
84 immunostaining of the TRN (Fig. 1A1). Punctate labeling clearly separated from the injection site  
85 was found in the adjacent anterodorsal (AD), laterodorsal (LD) and in the centrolateral (CL) nuclei  
86 (Fig. 1A2, Suppl. Fig. 1), consistent with prior tracing studies (Gonzalo-Ruiz and Lieberman,  
87 1995b, a; Lozsádi, 1995; Pinault and Deschênes, 1998). Labeling was also found in deep layers  
88 of prelimbic cortex that extended into infralimbic and cingulate, and, in two cases, into motor  
89 cortical areas, consistent again with a previous study in rat (Lozsádi, 1994). Our attention was  
90 drawn to a distinct stretch of puncta extending from parahippocampal regions into RSC (Fig. 1A2).  
91 Labeling included in particular the deep layers of the PreS that is interposed between the  
92 subiculum, the parasubiculum and the RSC (Ding, 2013; Simonnet and Fricker, 2018).

93 We next used the anterograde tracer, *Phaseolus vulgaris*-leucoagglutinin (PHAL-L), to confirm  
94 projections from RSC and PreS to anterior TRN. Through a panel of injections (n = 20) that  
95 targeted restricted portions of RSC, dPreS and ventral PreS (vPreS) (Fig. 1B1), we noted a  
96 nucleus-specific labelling pattern in the LD, AD, and anteroventral (AV) thalamus, which is also  
97 part of ATN (Fig. 1B2). Injections centered within the RSC labeled large portions of AD and LD,  
98 while sparing AV, whereas PreS-centered injections covered more restricted portions of LD, AD  
99 and AV. vPreS injections labeled the most lateral portion of LD and AV. All labeled fibers arborized  
100 within the most anterodorsal portions of TRN (Fig. 1B3), with fibers surrounding TRN cell bodies,  
101 pointing towards putative synaptic connections.

### 102 **The PreS/RSC establishes functional excitatory synapses onto TRN**

103 We used whole-cell patch-clamp recordings to address the presence of functional connections  
104 between PreS/RSC, anterodorsal TRN and ATN in acute coronal slices from brains of mice  
105 injected with AAV1-CaMKIIa-ChR2-EYFP into PreS/RSC 3 – 5 weeks earlier (Fig. 2A). Cells  
106 patched within anterodorsal TRN showed rebound burst behavior, as recognizable by repetitive  
107 high-frequency bursts of action potentials after brief hyperpolarization, similar to posterior sensory  
108 TRN cells (Fig. 2B) (Fernandez et al., 2018). Electrical properties were also similar to those of  
109 their posterior counterparts (Fig. 2A-C), although cells produced less repetitive bursts (Fernandez  
110 et al., 2018; Vantomme et al., 2019). Cells in AD, AV and LD showed properties typical for dorsal  
111 thalamocortical neurons, notably the presence of only a single rebound burst discharge  
112 (Huguenard, 1996) (Suppl. Fig. 2).

113 Optogenetic stimulation of PreS/RSC fibers was applied while recording from voltage-clamped  
114 neurons of the anterodorsal TRN and of AD, AV and LD (Fig. 2D,E). The location of cells within  
115 the different thalamic nuclei was evident while guiding the patch pipette to the target region and  
116 was confirmed in a subgroup of cells through perfusion with neurobiotin and *post-hoc* recovery  
117 (n=33/106) (Fig. 2D1). Rapid synaptic inward currents were elicited in all responsive cells (Fig.  
118 2D2). The connectivity, quantified based on the presence of such synaptic currents in the  
119 complete set of recorded cells, was > 80 % for all areas (Fig. 2D3). Synaptic currents were time-  
120 locked to the stimulus, with a fixed and short latency to response onset and sub-millisecond jitter  
121 (Fig. 2D4,D5). Response latency was inversely proportional to light intensity (Suppl. Fig. 2), which  
122 is consistent with an action potential-dependent mode of synaptic transmission (Gjoni et al.,  
123 2018). There is thus a direct, monosynaptic connection from PreS/RSC to anterodorsal TRN and  
124 to AD, AV and LD.



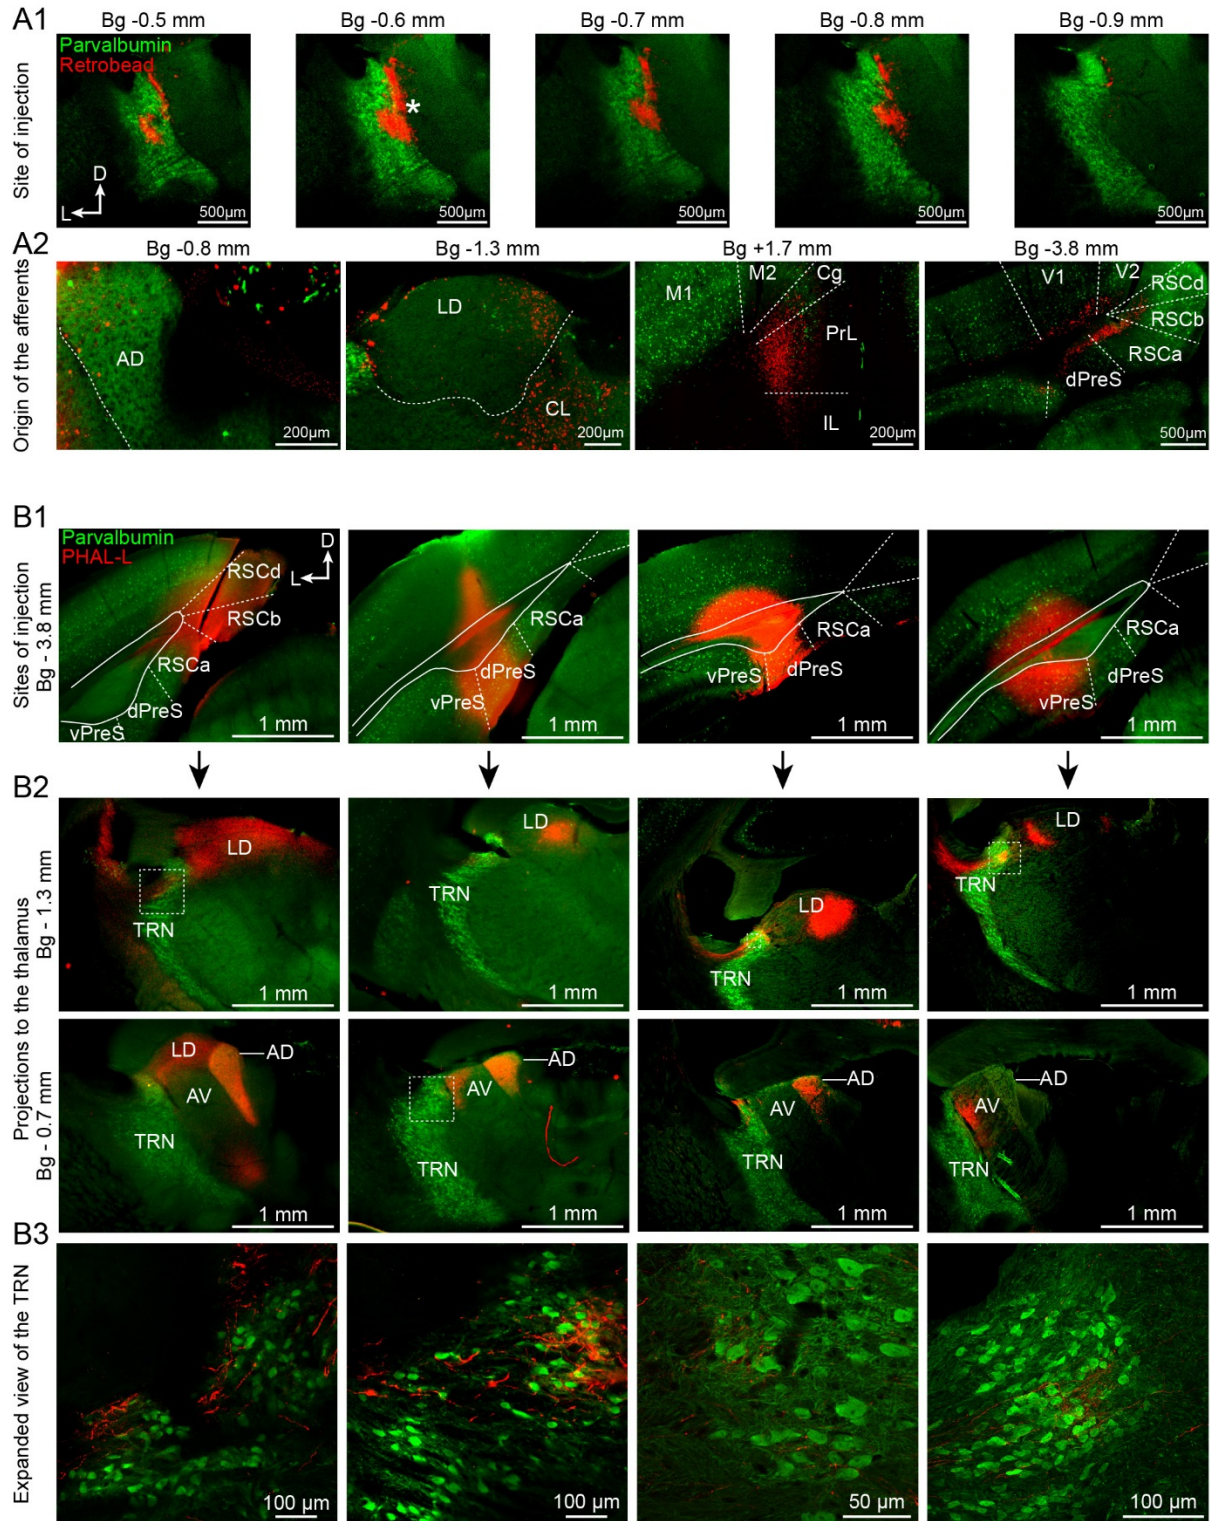

125

126

127 **Figure 1. The RSC and the PreS send topographically organized projections to the anterior**  
128 **thalamus and TRN.**

129 **(A1)** Epifluorescent micrographs of mouse coronal brain sections showing a retrobead (red)  
130 injection site (\*) into the anterior portion of the TRN, which spread ~300  $\mu$ m along the  
131 anteroposterior extent of the TRN (immunostained for PV, green). Bg, Bregma. **(A2)**  
132 Epifluorescent micrographs showing retrogradely labeled brain regions. Anterodorsal thalamus  
133 (AD) – Laterodorsal thalamus (LD) – Centrolateral thalamus (CL) – Cingulate cortex (Cg) –  
134 Prelimbic/Infralimbic cortex (PreL/IL) – dorsal Presubiculum (dPreS) – Retrosplenial cortex (RSC)  
135 – Visual cortex (V1/V2) – Motor cortex (M1/M2). **(B1)** Epifluorescent micrographs of 4 different  
136 injection sites of PHAL-L (red) into (from left to right) RSC, PreS, dPreS and ventral PreS (vPreS).  
137 Green, PV+ neurons. **(B2)** Epifluorescent micrographs of coronal sections in ATN at Bg -1.3 mm  
138 (top) and -0.7 mm (middle). Note labeled fibers visible in the anterodorsal TRN (dotted squares).  
139 **(B3)** Expanded confocal microscopy views of areas indicated by dotted squares in B2, AV,  
140 anteroventral thalamus.

141

142 Light-evoked postsynaptic currents (EPSCs) were mediated by glutamatergic synaptic receptors,  
143 as verified in a subset of 5 TRN and 5 neurons of AD, AV or LD (jointly referred to here as ATN+)  
144 (Fig. 2E1). Thus, the AMPA receptor antagonist 6,7-Dinitroquinoxaline-2,3(1H,4H)-dione (DNQX,  
145 40  $\mu$ M, bath-application) reduced responses by > 90 % at -60 mV (Fig. 2E1,E2). The block was  
146 not complete, suggesting activation of non-AMPA receptors. Indeed, a current component  
147 sensitive to the NMDA receptor antagonist DL-2-Amino-5-phosphonovaleric acid (APV) was  
148 detectable at +40 mV (Fig. 2E1, E2). NMDA/AMPA ratios were comparable to previous studies in  
149 sensory TRN and thalamus (Fernandez et al., 2017). Moreover, the TRN-EPSCs had a twice-  
150 shorter half-width than ATN+-EPSCs (Fig. 2E3) and a faster decay time (Fig. 2E4). PreS/RSC  
151 inputs thus convey a phasic excitatory input onto anterodorsal TRN cells.

152 **PreS/RSC establishes strong unitary connections with driver characteristics onto**  
153 **anterodorsal TRN**

154 TRN and ATN+ neurons were robustly innervated by PreS/RSC afferents, with compound EPSC  
155 amplitudes ranging from -25 pA to -1157 pA at high light intensities, although there were nucleus-  
156 specific differences (Fig. 3A). Both large and small EPSCs were obtained in slices from the same  
157 animals, excluding variable viral transduction as a major reason for this variability. To assess how  
158 variability was based on strength and connectivity of PreS/RSC afferents, we used minimal  
159 optogenetic stimulation through reducing light intensity to variably evoke failures and successful  
160 responses at comparable rates (mean failure rate  $47 \pm 3$  %) (Fig. 3B1). Unitary PreS/RSC EPSCs  
161 of TRN cells were 4- to 5-fold larger than the ones established onto AD and AV cells (Fig. 3B2).  
162 Dividing the maximally evoked EPSC amplitude by the unitary one, we calculated ranges of 1 –

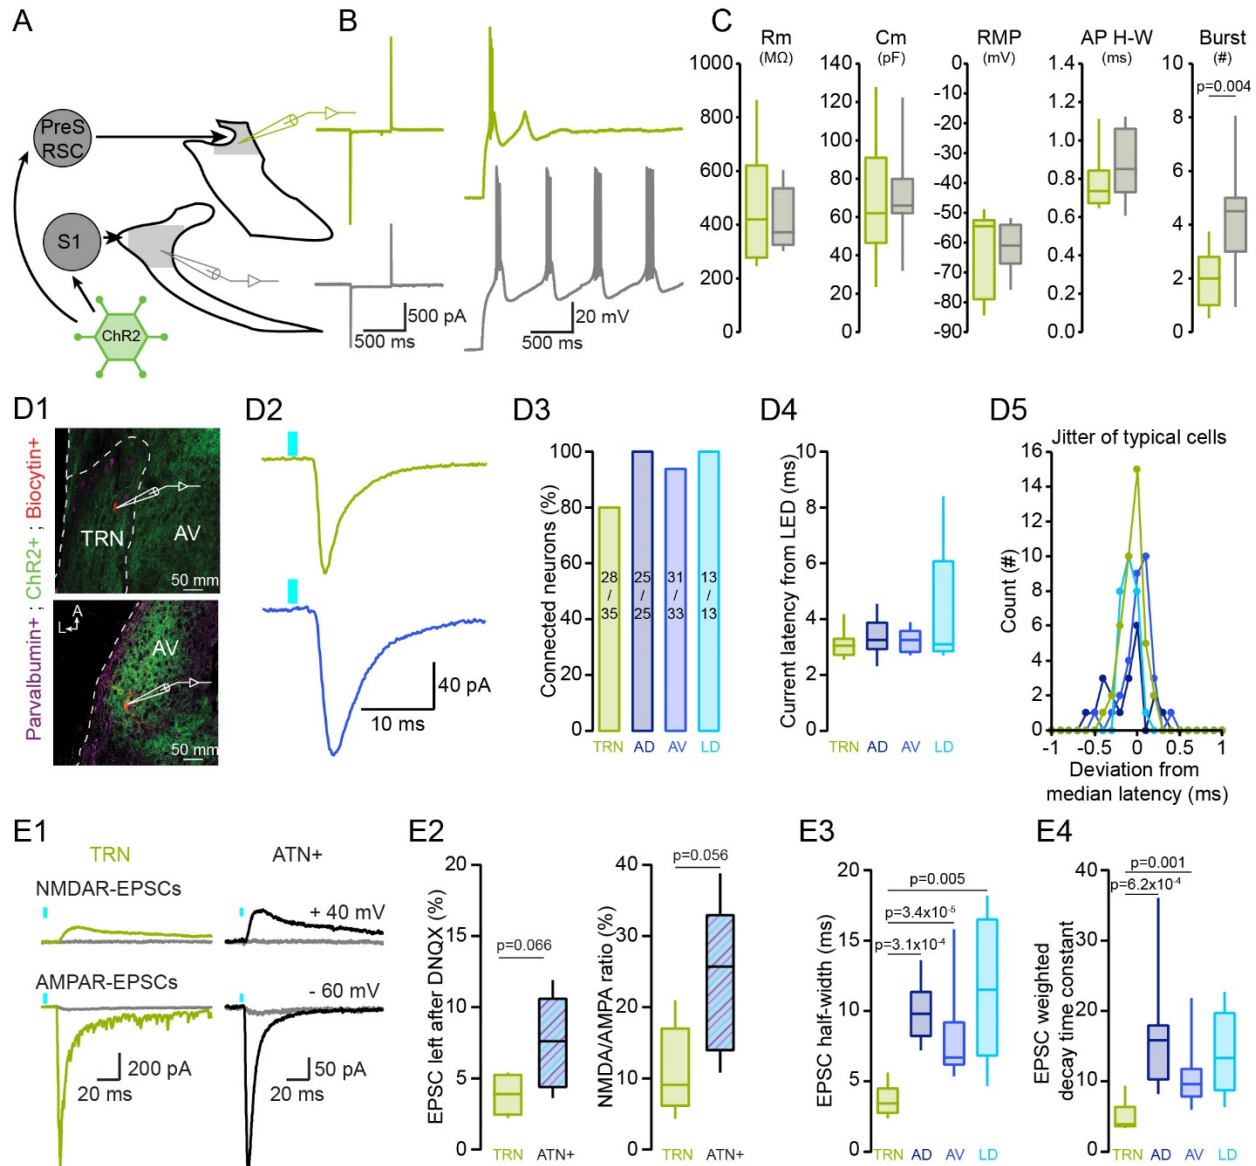

163

164 **Figure 2. The PreS/RSC establishes functional excitatory synapses onto TRN**

165 **(A)** Scheme of viral injections (AAV1-CamKIIa-ChR2-EYFP) into PreS/RSC or primary  
 166 somatosensory cortex (S1) followed by whole-cell patch-clamp recordings. **(B)** Responses of a  
 167 PreS/RSC-connected TRN neuron (green) and a S1-connected TRN neuron (grey) to a 10 mV  
 168 hyperpolarizing step in voltage-clamp (Left) and to negative current injection in current-clamp  
 169 (Right). **(C)** Box-and-whisker plots of cellular properties of PreS/RSC-connected ( $n = 16$ ) and S1-  
 170 connected TRN neurons ( $n = 11$ ). From left to right: Membrane resistance ( $R_m$ ), membrane  
 171 capacitance ( $C_m$ ), resting membrane potential (RMP), action potential (AP) half-width (H-W),  
 172 burst number. Mann-Whitney U tests were used for comparing  $R_m$ , RMP and AP H-W, Student's  
 173  $t$  tests for  $C_m$  and Burst number. Data from S1-connected TRN neurons re-used from a previous  
 174 study (Fernandez et al., 2018) **(D1)** Confocal micrographs of 300  $\mu\text{m}$ -thick mouse brain sections  
 175 showing the whole-cell recorded TRN (top) and AV (bottom) neurons filled with neurobiotin (red).  
 176 Green, ChR2-EYFP-expressing PreS/RSC afferents, magenta, PV+ TRN cells. **(D2)** Current



177 responses of TRN (top) and AV (bottom) neurons to optogenetic activation (blue bars, 1 ms, 3.5  
178 mW power, 455 nm) of PreS/RSC afferents, recorded at -60 mV. **(D3)** Connectivity histogram,  
179 calculated as the fraction (in %) of neurons responding to optogenetic stimulation. **(D4)** Box-and-  
180 whisker plot of response latencies (calculated from LED onset, 'from LED') in the TRN (n = 12),  
181 AD (n = 16), AV (n = 16) and LD (n = 6). Mann-Whitney U tests and Bonferroni correction:  $\alpha =$   
182 0.0083. **(D5)** Jitter of response latencies (deviation from mean) in one cell from TRN, AD, AV and  
183 LD across all stimulation trials. **(E1)** Pharmacological analysis of typical evoked excitatory  
184 postsynaptic currents (EPSCs) in TRN and ATN+, showing AMPA- and NMDA-EPSCs and their  
185 suppression by DNQX (40  $\mu$ M) and APV (100  $\mu$ M), respectively (superimposed grey traces). **(E2)**  
186 Box-and-whisker plots of DNQX effects (left, in % of original response amplitude, n = 5 for both  
187 TRN and ATN+) and of NMDA/AMPA ratios (right). Values of p from Student's *t* tests. **(E3)** Box-  
188 and-whisker plot of EPSC half-widths for TRN (n = 7), AD (n = 8), AV (n = 14) and LD (n = 5).  
189 Mann-Whitney U tests and Bonferroni correction:  $\alpha = 0.0083$ . Statistically significant p values are  
190 indicated. **(E4)** Box-and-whisker plot of the EPSC weighted decay time constant in TRN (n = 7),  
191 AD (n = 8), AV (n = 14) and LD (n = 5). Same statistical analysis as E3.

192

193 19 fibers for TRN, 2 – 32 fibers for AD and 8 – 86 fibers for AV. Therefore, although variable, TRN  
194 cells are, on average, targeted by a comparatively small number of fibers, but each with greater  
195 unitary strength. A large unitary response size has also been described for cortical projections  
196 onto sensory TRN (Golshani et al., 2001; Gentet and Ulrich, 2004; Cruikshank et al., 2010). To  
197 determine how many of these fibers were necessary to bring TRN cells to threshold for action  
198 potential firing, we performed cell-attached patch-clamp recording to preserve cellular integrity  
199 during PreS/RSC synaptic stimulation (Fig. 3C1). Action current numbers showed a steep  
200 sigmoidal light dependence with half-maximal values reached at 0.63 mW (Fig. 3C2,C3).  
201 Subsequent whole-cell mode recording in 5 out of 6 cells confirmed that these were bursts of  
202 action potentials riding on a low-threshold calcium spike, which showed similar light dependence  
203 (half-maximal number of action potentials at 0.92 mW) (Fig. 3C1,C3). In particular, at a light  
204 intensity corresponding to the one used for minimal stimulation ( $0.19 \pm 0.02$  mW), single spikes  
205 were riding on triangularly shaped calcium spikes. Single or few active synaptic inputs from  
206 PreS/RSC appear thus sufficient to bring TRN cells to threshold through reliable EPSP-low  
207 threshold burst coupling.

208 Excitatory afferents into thalamus have been divided into 2 major groups, drivers and modulators  
209 (Sherman, 2017). To determine the nature of PreS/RSC afferents, we determined paired-pulse  
210 ratios (PPRs) of TRN-and ATN+-EPSCs. Under our ionic conditions, PPRs remained close to 1  
211 until at least 10 Hz (Fig. 3D1,D2, Suppl. Fig. 3). When plotting results from individual experiments,  
212 all data points clustered around 1 for 1-10 Hz, supporting a homogeneity of fibers. This short-term  
213 plasticity profile is characteristic for a driver input onto anterodorsal TRN, which is contrary to the



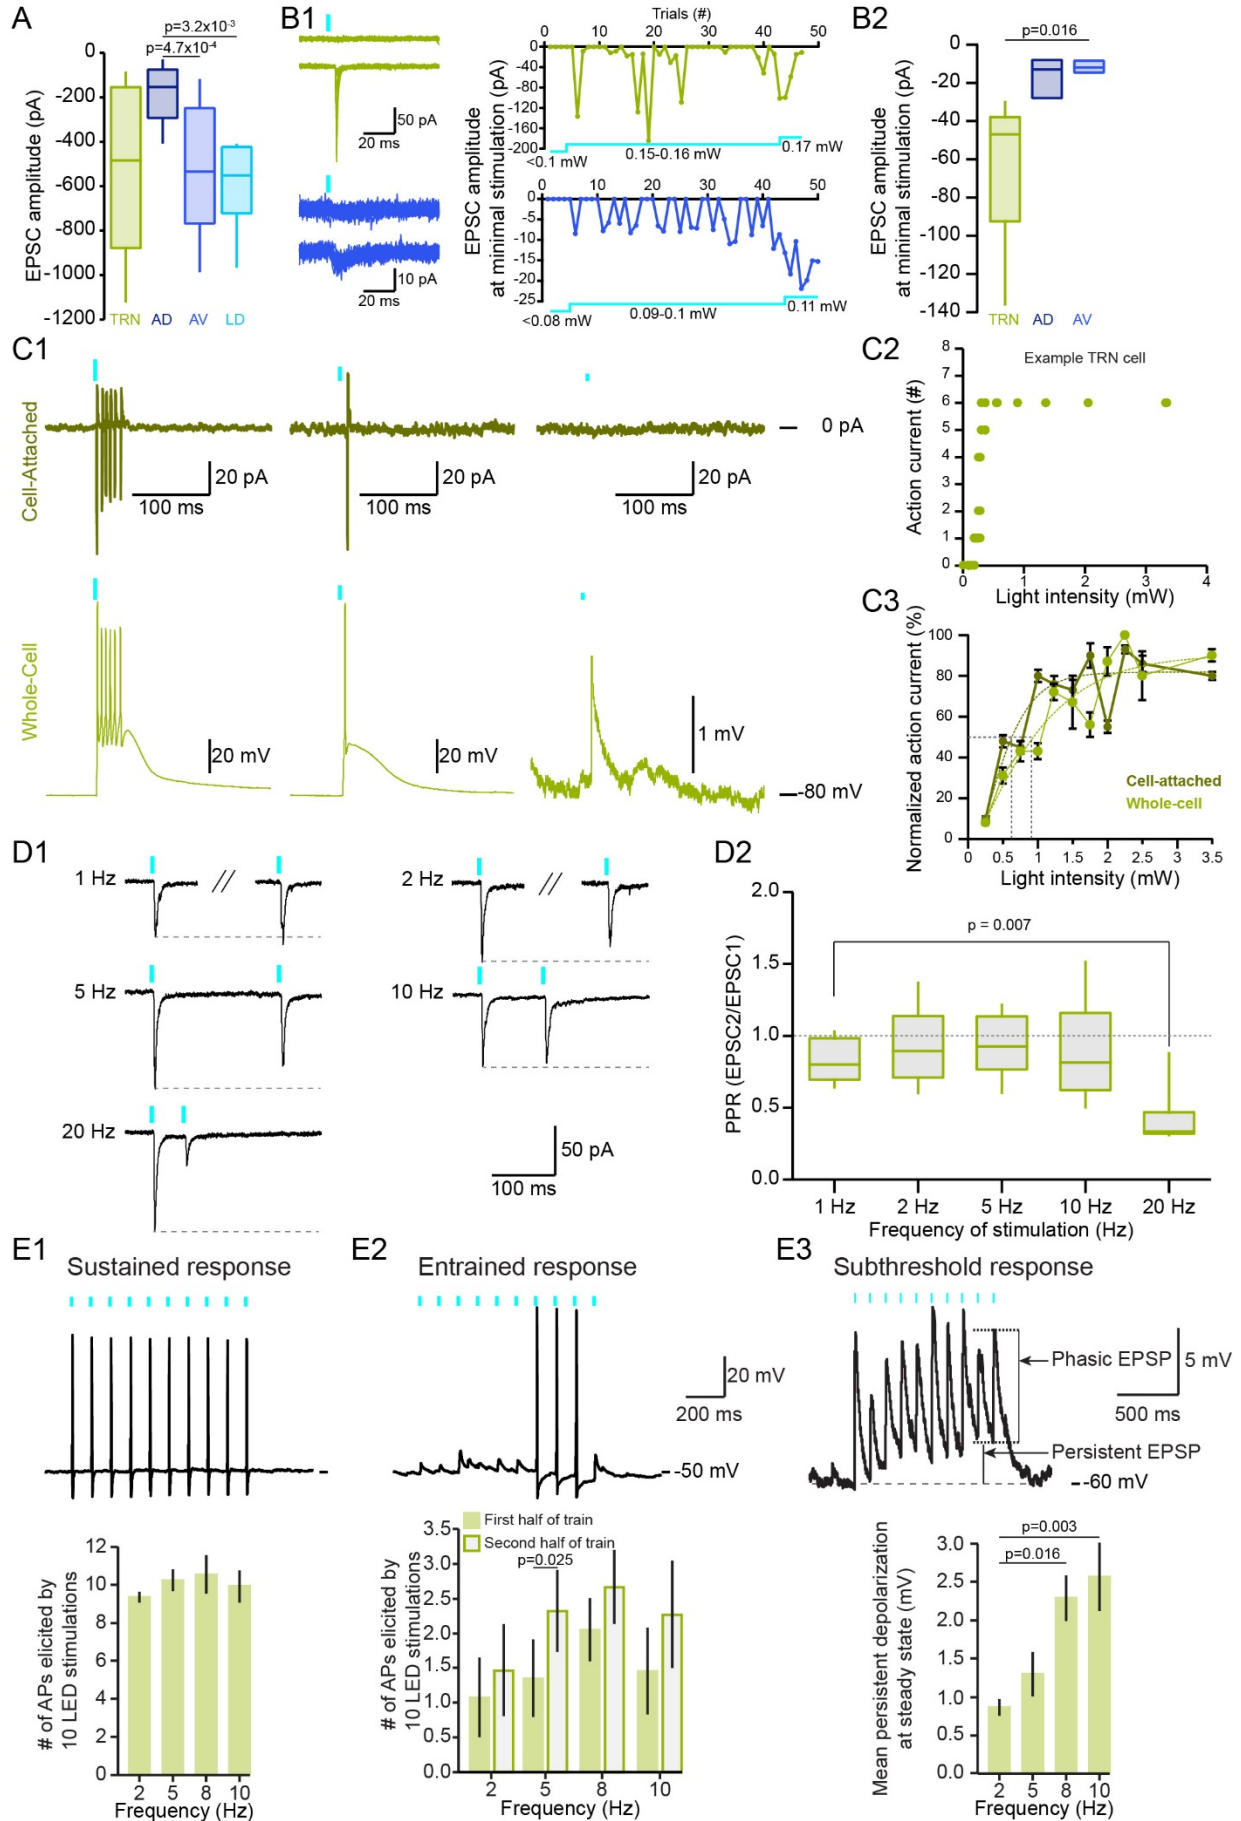

215 **Figure 3. The TRN receives strong unitary connections with driver characteristics from the**  
216 **PreS/RSC.**

217 **(A)** Box-and-whisker plot of maximally evoked compound EPSC amplitudes in TRN (n = 12), AD  
218 (n = 16), AV (n = 16), LD (n = 6). The intensity of the LED was reduced to ~20 % of the maximum  
219 in 4/16 AV and 4/6 LD cells to prevent escape currents. 1-factor ANOVA,  $p = 1.25 \times 10^{-3}$ , post hoc  
220 Student's *t* tests with Bonferroni correction:  $\alpha = 0.0083$ . **(B1)** Minimal stimulation experiment. Left,  
221 overlay of successes and failures for a TRN and an AV neuron in one experiment. Right: Time  
222 course of the same experiment. Blue trace: intensity of the light stimulation. At minimal stimulation  
223 (0.15-0.16 mW for the TRN cell and 0.09-0.1 mW for the AV cell), the failure rate was ~50 %  
224 (22/39 failures for the TRN neuron, 20/39 failures for the AV neuron). Increasing the light intensity  
225 brought the failure rate to 0 % (right part of the graph). **(B2)** Box-and-whisker plot of the amplitude  
226 of successfully evoked unitary EPSCs in TRN (n = 5), AD (n = 3) and AV (n = 4). Repeated Mann-  
227 Whitney U tests with Bonferroni correction:  $\alpha = 0.017$ . **(C1)** Top: representative responses of a cell-  
228 attached TRN neuron recording exposed to maximal (left), intermediate (middle) and low (right)  
229 light intensities. Bottom: Same experiment in whole-cell current-clamp mode. **(C2)** Graph of action  
230 current number for the TRN neuron shown in C1. **(C3)** Same as in C2 for the average of all TRN  
231 neurons (cell-attached n = 6, whole-cell n = 5). Data were binned in 0.25 mW light steps. Action  
232 current number normalized to the maximum evoked in each neuron. **(D1)** Representative TRN  
233 EPSCs at -60 mV upon paired-pulse stimulation at 1, 2, 5, 10 and 20 Hz. Grey dotted lines:  
234 amplitude of the first EPSC. **(D2)** Box-and-whisker plot of paired-pulse ratios (TRN: n = 16). Paired  
235 Student's *t* tests or Wilcoxon signed rank-test and Bonferroni correction:  $\alpha = 0.013$ . **(E1)** Top:  
236 typical membrane voltage response of a TRN neuron to a 10 Hz-light stimulation train. Bottom:  
237 Histogram of means (n = 7). Wilcoxon signed rank-tests and Bonferroni correction:  $\alpha = 0.017$ .  
238 **(E2)** Top: same as in E1 for neurons responding with a subthreshold response at train onset.  
239 Bottom: Histogram of means (n = 6). Wilcoxon signed rank-test (at 2 Hz) and Paired Student's *t*  
240 tests (at 5, 8, 10 Hz). **(E3)** Top: same as in E1 for subthreshold responses in a TRN neuron held  
241 at -60 mV. Bottom: Histogram of the mean persistent depolarization (n = 5). The persistent  
242 depolarization measured on the last 3 stimulations. 1-factor RM ANOVA,  $p = 0.033$ , post hoc  
243 paired Student's *t* tests and Bonferroni correction:  $\alpha = 0.017$ .

244

245 modulatory profile of cortical input onto sensory TRN, showing paired-pulse facilitation (PPF)  
246 (Fernandez et al., 2018).

247 At depolarized potentials, where tonic discharge is prevalent, PreS/RSC afferents reliably  
248 sustained TRN discharge during stimulation trains (Fig. 3E1). Furthermore, initially subthreshold  
249 responses could become suprathreshold in the course of a train (Fig. 3E2), most likely due to  
250 temporal summation that gave rise to a persistent depolarization on top of the phasic events (Fig.  
251 3E3). Similar results were found at PreS/RSC-ATN+ synapses (Suppl. Fig. 3).

252 **PreS/RSC afferents mediate feedforward inhibition onto ATN+ through recruiting burst**  
253 **discharge in PV- and somatostatin (Sst)-expressing TRN cells**

254 How does TRN recruitment by PreS/RSC afferents regulate ATN+ activity? We first tested *in vitro*  
255 for PreS/RSC-triggered feedforward inhibition onto ATN+ (Fig. 4A). ATN+ cells were held at

256 voltages to separately monitor EPSC and IPSC components (-60 mV and +15 mV) (see Methods  
257 for further details). Out of 22 ATN+ neurons innervated by PreS/RSC, 19 (9 AD, 5 AV, 5 LD)  
258 presented with a strong outward current at +15 mV, consistent with an evoked inhibitory  
259 postsynaptic current (IPSC) (Fig. 4B). The IPSC latency was higher than the EPSC latency (Fig.  
260 4C), consistent with a disynaptic feedforward inhibition. IPSCs were mediated through GABA<sub>A</sub>  
261 receptors (Fig. 4D1,D2). To demonstrate that these IPSCs were indeed mediated by anterodorsal  
262 TRN, we combined opto- and chemogenetics in VGAT-Ires-Cre mice expressing the inhibitory  
263 Designer Receptor Exclusively Activated by Designer Drugs (DREADD) specifically in the  
264 GABAergic cells of anterodorsal TRN and Chr2 in PreS/RSC. Chemogenetic silencing of  
265 anterodorsal TRN through bath-application of the DREADD ligand clozapine N-oxide (CNO) while  
266 optogenetically activating PreS/RSC afferents indeed reduced the amplitude of the evoked IPSC  
267 (Fig. 4E1,E2).

268 The TRN contains subnetworks of PV- or Sst-expressing cells with possibly different functions  
269 (Clemente-Perez et al., 2017). We determined the contribution of these subnetworks to ATN+  
270 inhibition using PV-Cre and Sst-Cre mice expressing Chr2 in anterodorsal TRN. Chr2-positive  
271 fibers were visible throughout the AD, AV and LD in both mouse lines (Fig. 4F), and rapid IPSCs  
272 were elicited by activation of both PV- and Sst-expressing TRN cells in all thalamic nuclei (Fig.  
273 4G1,G2), suggesting a contribution of both subnetworks to ATN+ inhibition.

#### 274 **Anterodorsal TRN activation regulates action potential firing in ATN+ and sharpens the** 275 **tuning of HD cells**

276 We next addressed the consequences of PreS/RSC activity on unit activity of ATN+ through *in*  
277 *vivo* single unit recordings in freely behaving mice while optogenetically activating PreS/RSC  
278 bilaterally (Fig. 5A-C). Firing patterns of single units in the ATN+ (n=28/42 responsive units from  
279 3 mice), analyzed through raster plots, peri-event histograms and z-score analysis, fell into 4  
280 distinct classes. The first group (n=5) diminished firing rate within a time window of 15 – 40 ms  
281 that persisted for up to 65 ms (Fig. 5D1). The second group (n=7) showed a late increase in firing,  
282 with an onset from the LED stimulation ranging from 25 – 140 ms and persisting for up to 45 ms  
283 (Fig. 5D2), reminiscent of a rebound burst discharge. The third group, containing 1 unit only,  
284 showed an increase in firing rate only within the first 15 ms after light offset (Fig. 5D3). The last  
285 group (n=15) contained units with mixed responses that combined features of the first three  
286 groups (Fig. 5D4). In 12 of the mixed cases (Fig. 5D5), inhibition preceded delayed excitation  
287 (inhibition onset: 28±2 ms, rebound onset: 70±10 ms, Wilcoxon signed rank-test  $p = 3.90 \times 10^{-5}$ ).  
288 Similarly, late increases in firing rate were clearly distinct in latency compared to the rapidly

289 responding units (early:  $9 \pm 1$  ms, late:  $65 \pm 7$  ms, Mann-Whitney U test  $p = 4.18 \times 10^{-5}$ ). Five out of  
 290 42 ATN+ units were tuned to the mouse's HD, as quantified by the length of the Rayleigh vector  
 291 ( $r$ ) ( $r = 0.43 \pm 0.01$ ,  $n=5$ ) (Fig. 5E1) (see Methods, (Yoder and Taube, 2009)). PreS/RSC activation  
 292 induced a rebound firing in 2 of these (Fig. 5E2,E3). These results are consistent with a  
 293 feedforward inhibitory circuit recruited by PreS/RSC that is present throughout ATN+ and that  
 294 also targets HD cells.

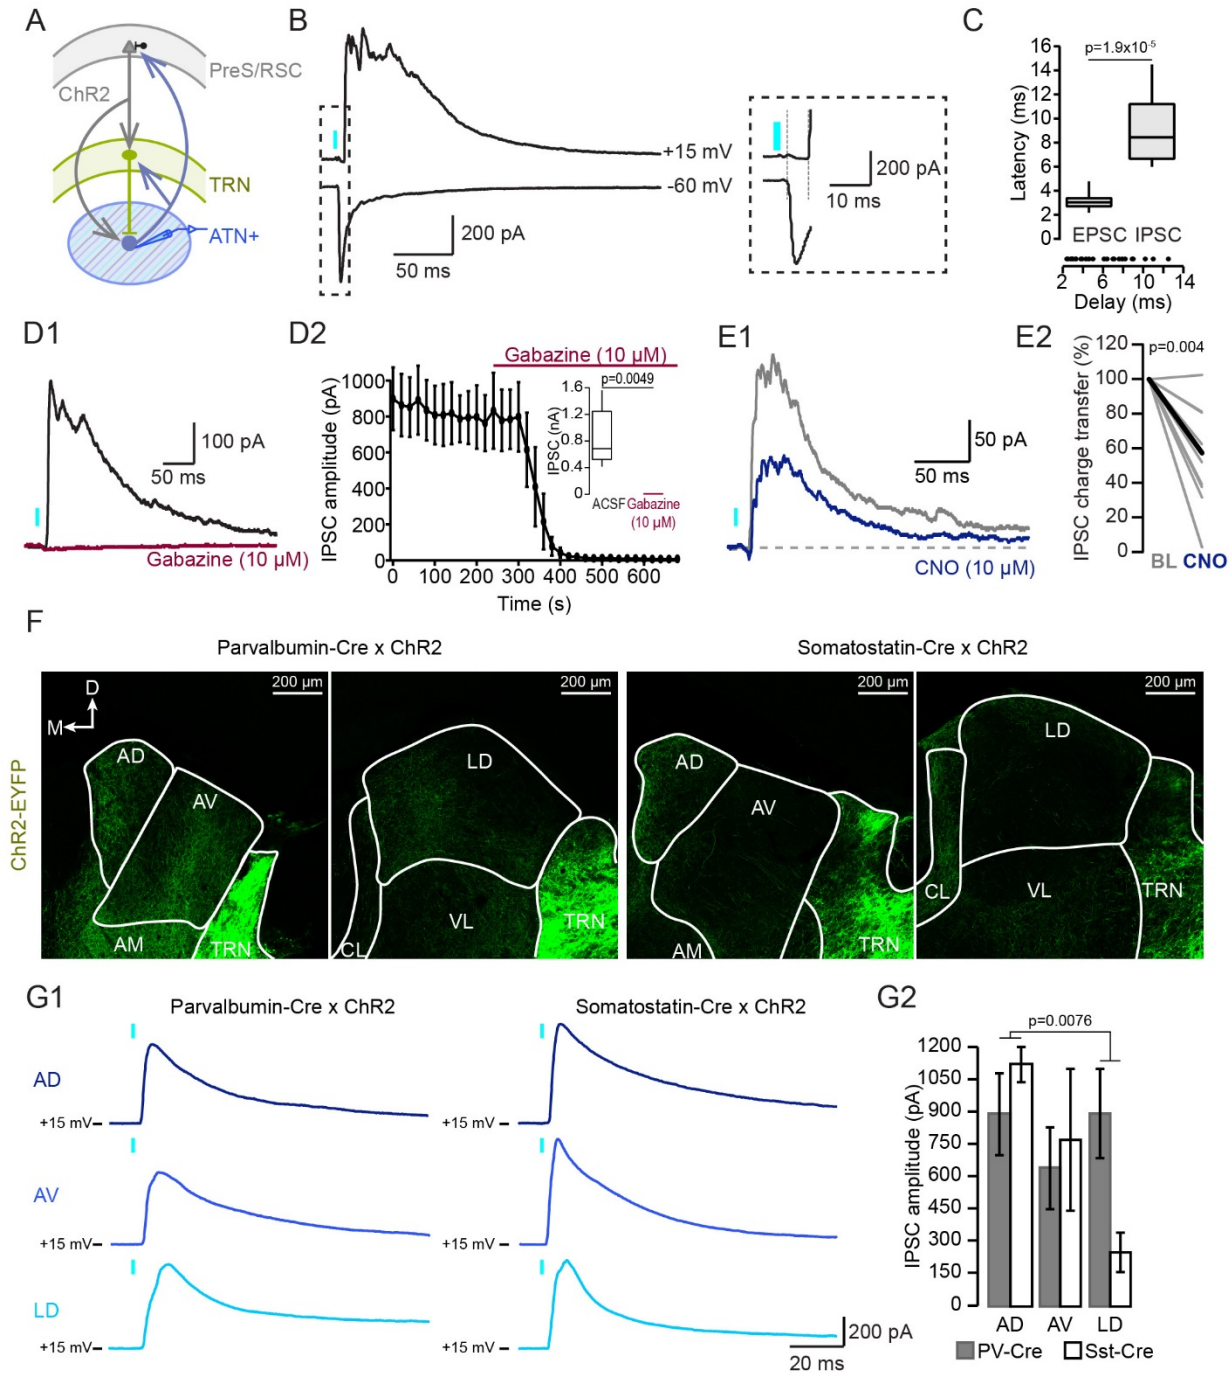



296 **Figure 4. PreS/RSC afferents mediate feedforward inhibition onto anterior thalamus**  
297 **through recruiting burst discharge in PV- and Sst-expressing TRN cells.**

298 **(A)** Scheme of the hypothesized circuit studied *in vitro*. **(B)** Typical current responses of an ATN+  
299 neuron held successively at -60 and +15 mV to record EPSC and IPSC. Portion indicated by  
300 dotted rectangle is expanded on the right. Response latencies were measured from LED onset  
301 (grey vertical lines). **(C)** Top: Box-and-Whisker plot of EPSC and IPSC latencies in ATN+ neurons  
302 ( $n = 24$ ). Bottom: Delays between the onset of the IPSC and the EPSC for all experiments.  
303 Wilcoxon signed rank-test. **(D1)** A typical ATN+ IPSC before (black) and after (red) bath-  
304 application of the GABA<sub>A</sub> receptor antagonist gabazine. **(D2)** Time course of gabazine action ( $n$   
305 = 6). Inset: Box-and-Whisker plot of steady-state IPSC amplitude in ACSF and gabazine (paired  
306 Student's  $t$  test). **(E1)** IPSC evoked in an ATN+ neuron of a VGAT-Ires-Cre mouse expressing  
307 the inhibitory DREADD in anterodorsal TRN. IPSCs measured before (grey) and after (blue) 10  
308  $\mu$ M CNO bath-application. **(E2)** Representation of the charge transfer of IPSCs in ATN+ neurons  
309 ( $n = 10$ ). Wilcoxon signed rank-test. **(F)** Confocal micrographs of ChR2-expressing PV-Cre (left)  
310 and Sst-Cre (right) coronal brain sections of ATN+. **(G1)** Representative IPSCs elicited in ATN+  
311 neurons held at +15 mV. **(G2)** Histogram of IPSC amplitudes in AD ( $n = 6$  for both PV- and Sst-  
312 Cre mice), AV ( $n = 6$  for both) and LD ( $n = 6$  for both). 2-factors ANOVA with factors 'nucleus' and  
313 'cell type',  $p = 0.036$  for 'nucleus',  $p > 0.05$  for 'cell type', post hoc Student's  $t$  test with Bonferroni  
314 correction:  $\alpha = 0.017$  for IPSC amplitude between nuclei regardless of cell type.

315

316 Combining chemogenetic inhibition of anterodorsal TRN with silicone probe recordings targeted  
317 stereotaxically to the AD, the site of HD cells (Taube, 1995), we probed the role of anterodorsal  
318 TRN in further detail (Fig. 5F). Out of 22 sorted units, 11 were HD-tuned (Rayleigh  $r \geq 0.4$ ), 3  
319 were head-modulated ( $0.2 \leq r < 0.4$ ) and 8 were untuned, similar to previously observed  
320 proportions (Taube, 1995; Yoder and Taube, 2009). We compared the tuning, tuning width,  
321 preferred direction and firing rate at the preferred direction of the HD units during a baseline  
322 session and 40 min after i.p. injection of CNO (1 – 2 mg/kg) ( $n=11$ ) (Fig. 5G1,G2) or NaCl ( $n=10$ )  
323 (Suppl. Fig. 4). There was a trend for decreased tuning and a significant increase in the tuning  
324 width after CNO injection compare to baseline. NaCl injection did not induce changes in any of  
325 these parameters. There were no significant changes in preferred direction nor in firing rate with  
326 CNO nor NaCl. Therefore, the tuning curve of HD cells in AD in freely moving conditions  
327 deteriorates upon loss of TRN activity.

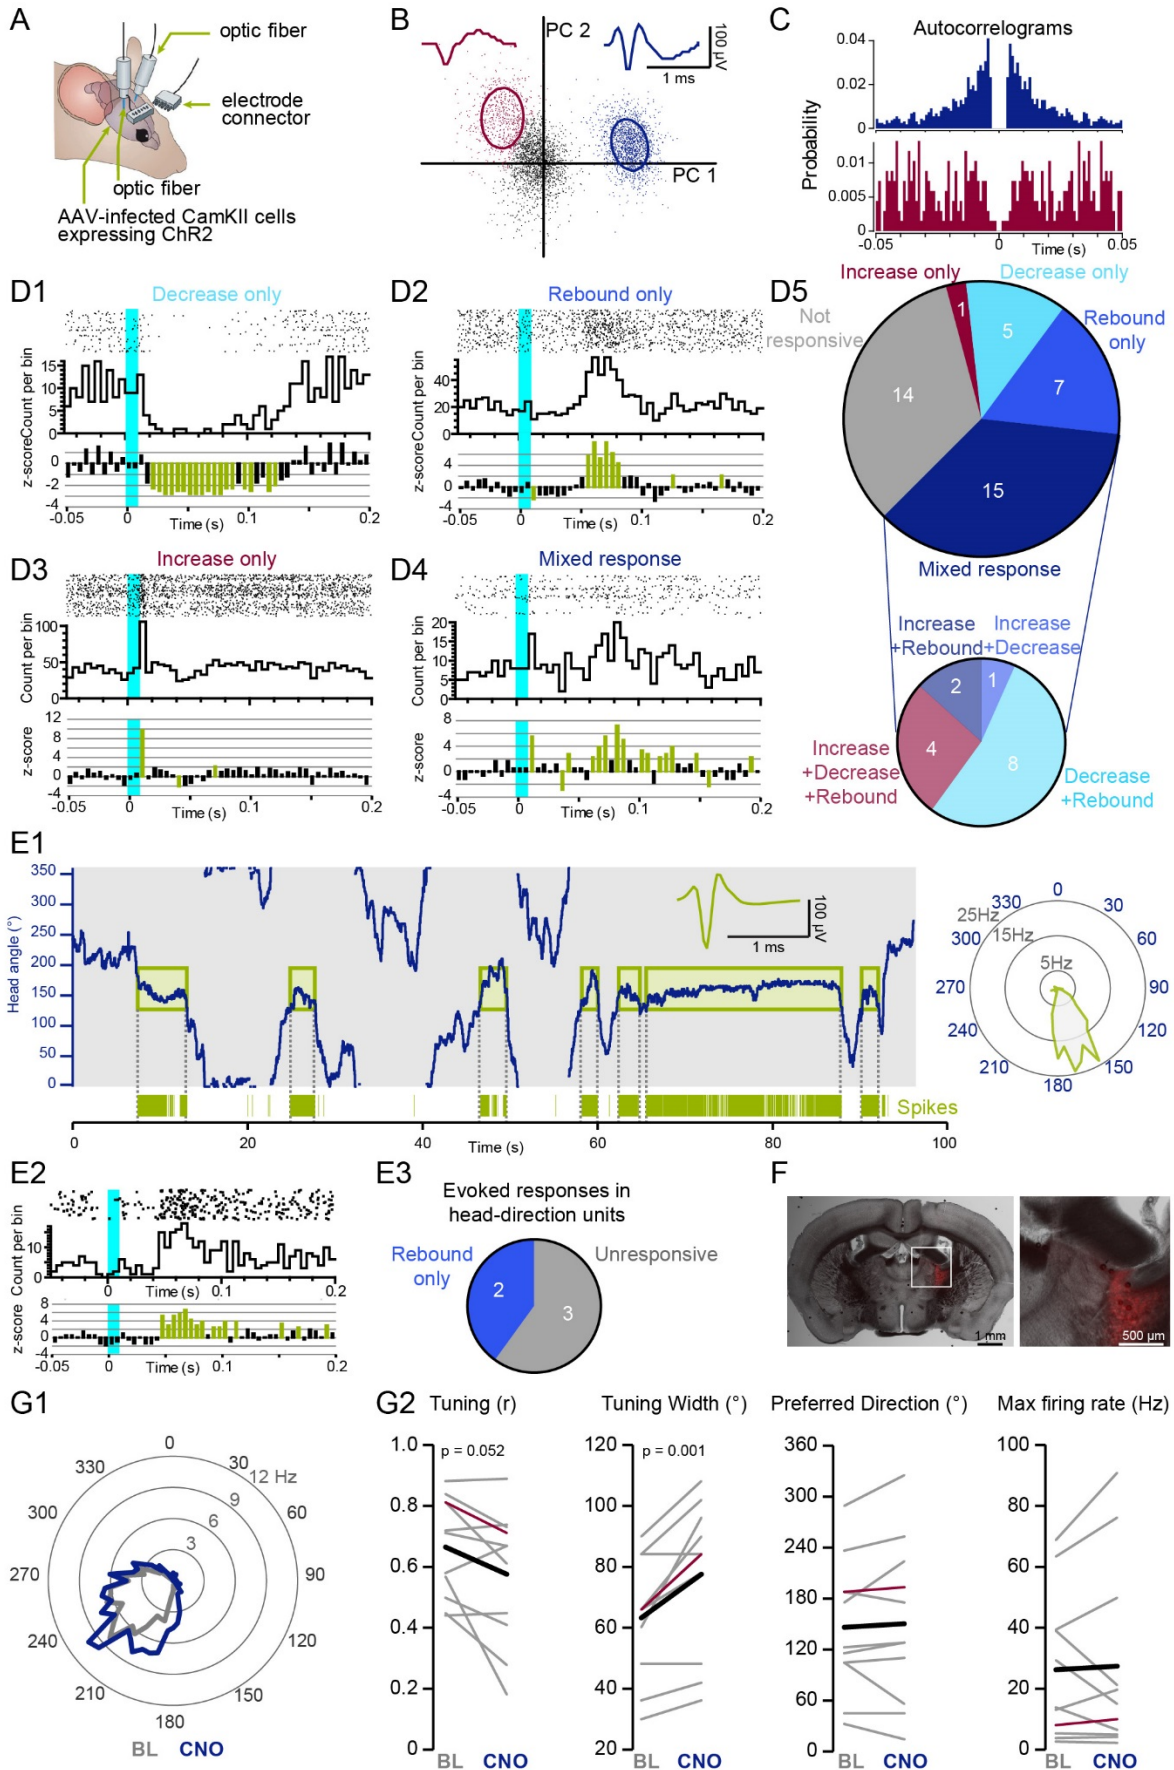

329 **Figure 5. Anterodorsal TRN activation regulates action potential firing in anterior thalamus**  
330 **and sharpens the tuning of head direction cells.**

331 **(A)** Scheme of the *in vivo* freely moving recording configuration. **(B, C)** Example of unit sorting  
332 based on principal component analysis (B) and autocorrelation (C). Autocorrelograms of the  
333 sorted units from panel B showing the typical refractory period around 0. **(D1-D4)** Raster plot,  
334 cumulative histogram and z-score analysis for four characteristic unit responses. **(D5)** Pie charts  
335 showing the proportion of the four characteristic responses in all putative thalamic units. **(E1)**  
336 Graph showing the mouse HD (blue trace) in combination with detected spikes of a putative  
337 thalamic HD unit (vertical green lines) tuned around 150°. Insets: mean unit waveform and a polar  
338 plot of the tuning curve. **(E2)** Example of a HD unit response to light activation of PreS/RSC  
339 afferents. **(E3)** Pie chart of the proportion of head-direction units responsive to light activation of  
340 PreS/RSC. **(F)** Sections for the anatomical verification of silicone probe implantation in VGAT-  
341 Ires-Cre mice expressing the chemogenetic silencer hM4D-mCherry (red) in anterior TRN. **(G1)**  
342 Polar plot of a HD unit's tuning curve during baseline (grey) and after injection of CNO (blue).  
343 **(G2)** Quantification of the changes in tuning parameters by CNO (n = 11 HD units). Far left:  
344 Rayleigh vector length size. Middle left: width of the tuning curve (measure at half the maximum  
345 firing rate). Middle right: preferred direction. Right: the firing rate at the preferred direction. Grey  
346 lines: single units. Red line: example unit from G1. Black line: average. Paired Student's *t* tests to  
347 compare data during baseline and 40 min after CNO injection.

348

349 **Anterodorsal TRN inhibition biases navigational search strategies in the Morris water maze**

350 We chose the hidden platform version of the Morris water maze (MWM) to probe the role of  
351 anterodorsal TRN in spatial navigation. In this maze, both ATN-dependent egocentric and visual  
352 cue-dependent allocentric navigational strategies were reported (Stackman et al., 2012; Garthe  
353 and Kempermann, 2013). Mice were trained over 10 days to learn the hidden platform in a maze  
354 surrounded by visual landmarks, followed by a 10-day reversal learning during which the platform  
355 was located in the opposite quadrant (Suppl. Fig. 5A). We hypothesized that chemogenetic  
356 suppression of anterodorsal TRN activity, and reduction of PreS/RSC-mediated ATN+ inhibition,  
357 would alter navigational behavior once the animal had to rely on HD-dependent, egocentric  
358 strategies. We also asked whether there was a bias in search strategies already in the course of  
359 spatial learning.

360 We used two groups of mice: "control" VGAT-Ires-Cre and "DREADD" VGAT-Ires-Cre mice that  
361 expressed non-DREADD related proteins or the inhibitory DREADD specifically in the  
362 anterodorsal TRN, respectively (Fig. 6A). In each of the four daily test sessions, entry points into  
363 the maze were randomized across the quadrants to enforce the use of allocentric strategies. Both  
364 groups became faster swimmers in the course of the task and showed no significant difference in  
365 their mean swimming velocity during the 60-s probe sessions (with platform removed), although  
366 there was a light trend for control mice to be faster (Fig. 6B). We thus analyzed the proximity to

367 the platform instead of the latency to platform to account for possible effects of differences in swim  
368 speed (Awasthi et al., 2019). Based on this measure, both groups performed similarly, as  
369 indicated by a comparable decrease of the mean proximity to the platform during test sessions  
370 (Fig. 6C). Moreover, from days 5 – 7 of training, the percentage of time spent in the target  
371 quadrant was above chance level for both groups during probe sessions (Fig. 6D) These results  
372 show an overall comparable, if not slightly better performance of DREADD mice, but they do not  
373 provide information about the navigational strategies used. We hence classified swim trajectories  
374 on a trial-by-trial basis for all test sessions according to previously described criteria for allo- and  
375 egocentric strategies (Suppl. Fig. 6B-D) (Garthe and Kempermann, 2013; Rogers et al., 2017).  
376 Figure 6E shows that mice use a mix of trajectories reflecting the use of both ego- and allocentric  
377 strategies (Fig. 6E,I,K). Focusing first on early phases of reversal learning (day 11), DREADD  
378 mice showed perseverance around the previous platform location, while control animals reverted  
379 to trajectories consistent with egocentric strategies (Fig. 6F). If perseverance was indeed  
380 reflecting a decreased ability to change navigational strategy once the correct platform location  
381 was learned, signs of perseverance should also be seen in the course of learning. Indeed, when  
382 inspecting time-binned occupancy plots during probe sessions, DREADD mice persevered  
383 searching at the platform position for the whole 60 s-probe session, whereas control mice shifted  
384 to a dispersed search pattern of other regions of the pool during the last 20 s of the session. This  
385 was particularly the case during the last 2 probe sessions of the learning (beginning of day 9 and  
386 11) (Fig. 6 G,H).

387 Inspired by the finding on the DREADD mice's possibly compromised ability to deploy egocentric  
388 strategies during reversal learning, we asked whether evidence for biased strategy selection could  
389 also be found during initial platform learning. As is characteristic for the MWM, there was an  
390 increase in the proportion of allocentric strategies from day 1-2 to day 9-10 in both control and  
391 DREADD mice (Fig. 6 I,J) (Garthe and Kempermann, 2013). However, DREADD mice did so in  
392 temporal anticipation, showing significantly more scanning and less random search on day 3, and  
393 more direct swimming and less thigmotaxis on day 4 (Fig. 6J). DREADD mice also used an overall  
394 greater proportion of allocentric strategies across both learning and reversal learning than control  
395 mice (Fig. 6K). Together, suppression of anterodorsal TRN activity 1) alters navigational behavior  
396 at reversal learning and 2) biases the search patterns towards allocentric strategies during initial  
397 learning.



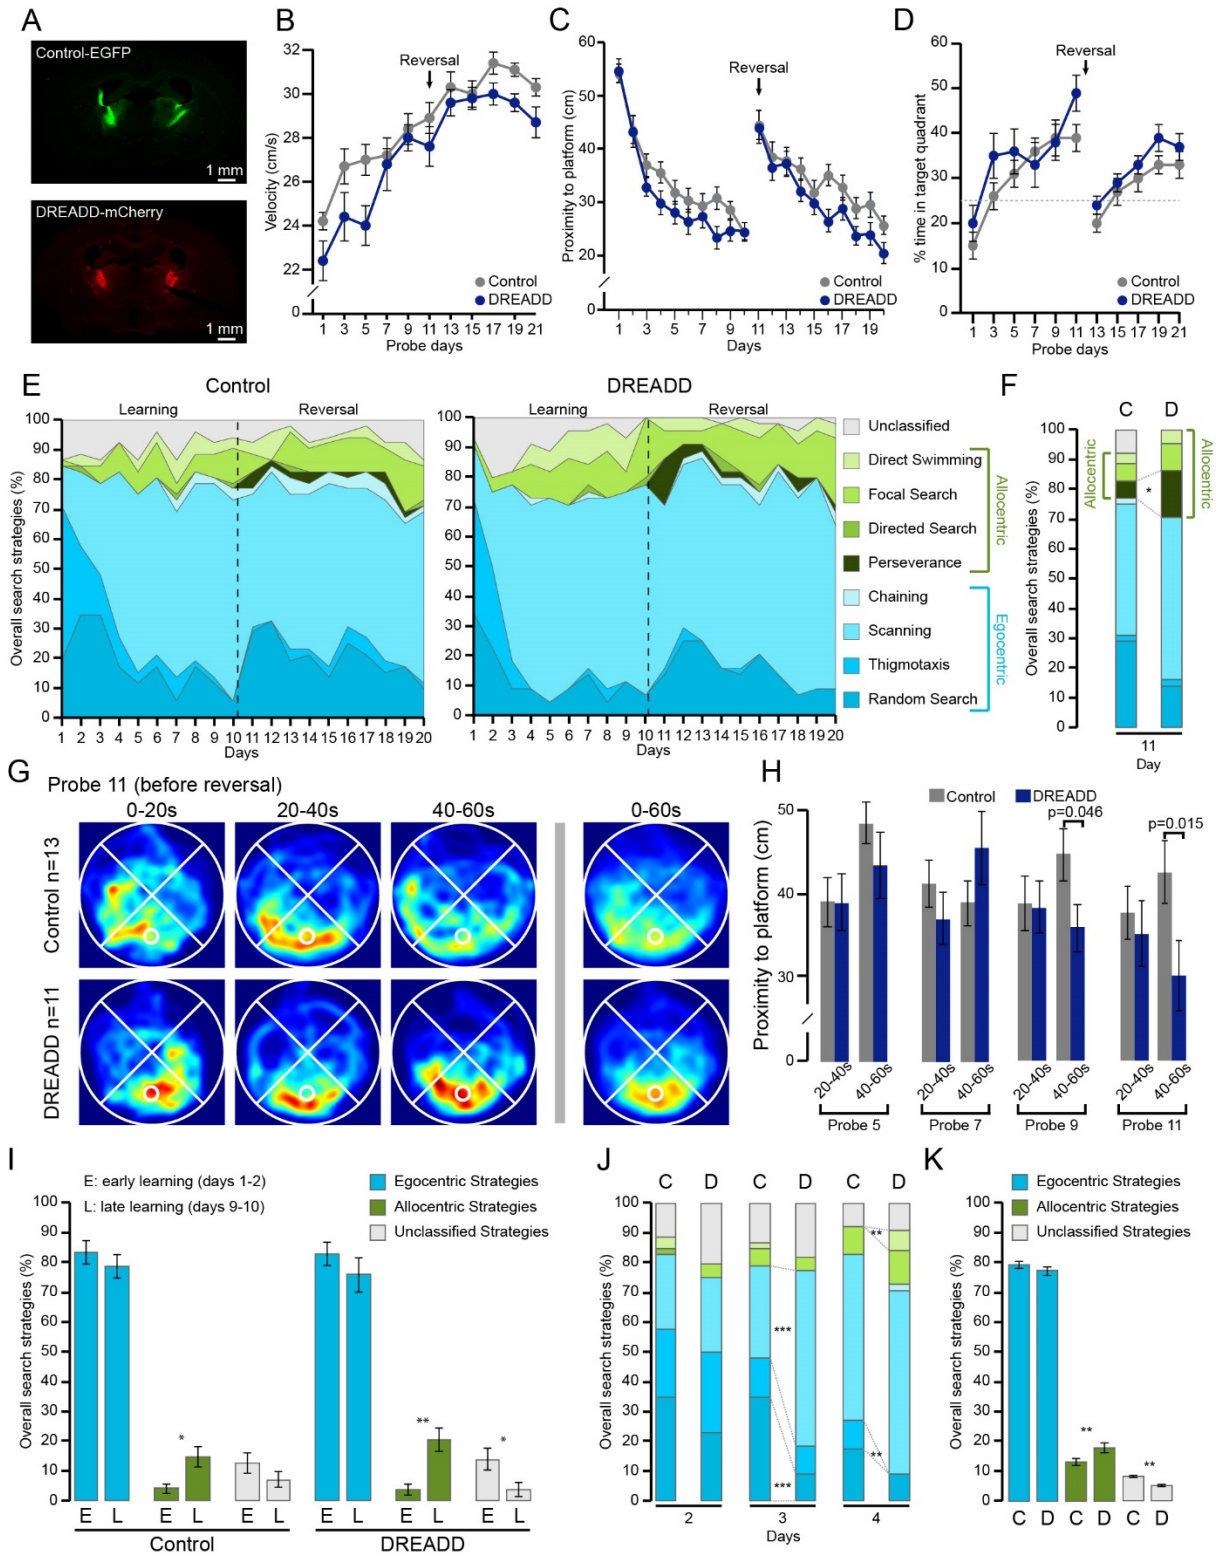

398

399

400 **Figure 6. Anterodorsal TRN inhibition biases navigational search strategies in the Morris**  
401 **water maze.**

402 **(A)** Epifluorescent micrographs of VGAT-Ires-Cre mouse coronal brain sections at Bg -0.8 mm  
403 for a control mouse (top) and a test mouse (bottom). Color codes indicate expression products.  
404 **(B)** Mean swim velocities of control (n = 13) and DREADD (n = 11) mice during probe sessions.  
405 2-factors RM ANOVA with factor 'day' and 'condition',  $p < 2 \times 10^{-16}$  for 'day' and  $p = 0.04$  for  
406 'condition'. Post hoc Student's *t* tests with Bonferroni correction:  $\alpha = 0.005$  for 'condition': not  
407 significant. **(C)** Graph of the mean proximity to the platform during training sessions. 2-factors RM  
408 ANOVA with factor 'day' and 'condition',  $p < 2 \times 10^{-16}$  for 'day' and  $p = 0.04$  for 'condition'. Post hoc  
409 Student's *t* tests and Mann-Whitney U tests with Bonferroni correction:  $\alpha = 0.003$  for 'condition':  
410 not significant. **(D)** Graph of the percentage of time spent in the target quadrant during probe  
411 sessions. Chi-square test against 25% chance, significant at days 1, 7, 9, 11 for Control and days  
412 5, 9, 11, 19, 21 for DREADD. **(E)** Stacked area graphs of search strategies used by control (left)  
413 and DREADD (right) mice during trial sessions. **(F)** Proportion of overall strategies at day 11 for  
414 control (C) and DREADD (D) mice. Chi-square tests for 'allocentric strategy' and for  
415 'Perseverance',  $p < 0.05$  for both. **(G)** Time-binned (20 s bins) and overall average occupancy  
416 plots during the last probe session of the learning phase. Hot colors indicate greater occupancy  
417 and are equally calibrated in all plots. **(H)** Histogram of the mean proximity to the platform of  
418 control and DREADD mice during binned-probe sessions. Student's *t* test for Control vs DREADD  
419 at late time bin (40 – 60 s). **(I)** Averaged proportion of egocentric, allocentric and unclassified  
420 strategies used during the early (E, days 1 and 2) and late (L, days 9 and 10) learning phase.  
421 Wilcoxon signed rank-tests,  $p = 0.02$  for allocentric strategies in control mice,  $p = 0.008$  and  $p =$   
422  $0.03$  for allocentric and unclassified strategies in DREADD mice, respectively. **(J)** Proportion of  
423 overall strategies at day 2, 3 and 4 for control (C) and DREADD (D) mice. Chi-squared tests for  
424 'Scanning' and for 'Random Search' at day 3,  $p < 0.001$  for both. Chi-square tests for 'Direct  
425 Swimming' and for 'Thigmotaxis' at day 4,  $p < 0.01$  for both. **(K)** Averaged proportion of egocentric,  
426 allocentric and unclassified strategies used during the whole experiment. Student's *t* test  
427 comparing Control (C) vs DREADD (D).

428

429 **Discussion**

430 Anatomical and physiological identification of synaptic inputs to TRN has repeatedly opened a  
431 novel point of view for the TRN's active role in gating sensory information flow to and from the  
432 cortex (for review, see (Crabtree, 2018)). We uncover here a previously undescribed excitatory  
433 input to TRN from the parahippocampal dPreS and the RSC that shows high connectivity,  
434 mediates robust feedforward inhibition to ATN and shapes HD tuning in AD. These findings offer  
435 a possible synaptic mechanism contributing to the flexible use of navigational strategies during  
436 spatial learning and orientation. We thus identify here a novel thalamocortical loop that integrates  
437 TRN and that expands its gating function to the domain of self-orientation and navigation. More  
438 generally, we favor a view of the TRN as a multi-modal saliency selector that interfaces between  
439 acute cognitive demands, such as attentional switching or spatial re-orientation, and the  
440 recruitment of the appropriate sensory and self-orientational HD signals.

441 Retrograde tracing from the anterodorsal portion of the TRN identified several previously  
442 described prefrontal cortical afferents (Cornwall et al., 1990; Lozsádi, 1994; Dong et al., 2019).  
443 We now additionally demonstrate that there is a continuous band of afferent projections along the  
444 presubicular-retrosplenial axis that starts at the border from subiculum to the PreS, thus at the  
445 onset of the six-layered presubicular complex. These projections arise in deep layers of PreS and  
446 RSC, to where projections to ATN were previously retrogradely traced (Wright et al., 2010). The  
447 anterodorsal TRN seems thus to integrate visuospatial and HD input in combination with saliency  
448 signals from prefrontal areas. The CL nucleus, a target of the superior colliculus, may convey  
449 orienting-movement related signals into TRN (Krout et al., 2001). Moreover, central amygdalar  
450 and hypothalamic inputs were recently described (Herrera et al., 2016; Dong et al., 2019).  
451 Together, this adds to a complex web of afferents that contrasts with the predominantly  
452 monomodal connectional characteristics of posterior sensory sectors of mouse TRN.

453 More work is required to elucidate the detailed organization of the anterodorsal synaptic  
454 connectivity from PreS/RSC to anterodorsal TRN and from there to ATN. We note here that both  
455 RSC and dPreS target LD and AD preferentially, while projections to AV are minor. AD and LD  
456 are thought to functionally cooperate within the HD system (Simonnet and Fricker, 2018; Perry  
457 and Mitchell, 2019), possibly acting as first- and higher-order nucleus, respectively (Peyrache et  
458 al., 2019). The AV, together with the anteromedial nucleus, has been so far associated with a  
459 theta-generating system innervated by vPreS (Perry and Mitchell, 2019). The limited spatial  
460 resolution of our tracing methods does not currently allow to verify whether anterodorsal TRN is  
461 also subdivided into sectors corresponding to this functional subdivision of ATN+. Interestingly,  
462 single-cell labeling identified rat anterodorsal TRN cells with axons bifurcating to innervate both  
463 AD and LD (Pinault and Deschênes, 1998). AM-projecting TRN cells were located more ventrally.  
464 Anterodorsal TRN may thus contain cells jointly innervating AD and LD, further substantiating a  
465 shared function.

466 Our characterization of a cortical excitatory innervation of TRN by PreS/RSC-excitatory input  
467 reveals a combination of commonalities but also notable differences to the canonical form of  
468 cortical input to sensory TRN that arises from layer 6 corticothalamic neurons of corresponding  
469 primary cortex (Usrey and Sherman, 2019). Layer 6 synapses on TRN cells show a high  
470 glutamate receptor content (Golshani et al., 2001), high unitary amplitude (Golshani et al., 2001),  
471 faster rise and decay times (Gentet and Ulrich, 2004), smaller NMDA/AMPA ratios (Astori and  
472 Lüthi, 2013) and marked PPF (Castro-Alamancos and Calcagnotto, 1999; Astori and Lüthi, 2013;  
473 Crandall et al., 2015) compared to their thalamocortical counterparts. The presence of PPF

474 classifies layer 6 corticothalamic afferents as modulators rather than drivers (Sherman and  
475 Guillery, 1998). While dPreS/RSC-TRN synapses are comparable in terms of unitary amplitude,  
476 NMDA/AMPA ratio and EPSC waveform, there is a prominent lack of PPF at dPreS/RSC afferents  
477 and a moderate entrainment of firing during repeated stimulation. Rather than being modulators,  
478 the PreS/RSC inputs thus shares a short-term plasticity profile reminiscent of the driver inputs  
479 that count as the principal information-bearing synapses. Top-down driver input is so far known  
480 for corticothalamic layer 5 projections to higher-order thalamic nuclei that show a number of  
481 morphological hallmarks (Usrey and Sherman, 2019). A driver profile that we suggest here for the  
482 first time for TRN implies that anterodorsal TRN conveys direct system-relevant information that  
483 is faithfully transmitted to its projection targets. We cannot exclude, however, that PreS and RSC  
484 afferents, if stimulated separately, would show different short-term plasticity including PPF. A  
485 further noteworthy point is that both PV+ and Sst+ TRN neurons innervate the AD, AV and LD  
486 with comparable strength, pointing to functional differences compared to sensory first-order  
487 thalamic nuclei (Clemente-Perez et al., 2017).

488 About 65% of ATN+ units showed a suppression of activity upon PreS/RSC stimulation that was  
489 occasionally followed by a rapid increase in discharge. The timing of the inhibition-rebound events  
490 is typical for a feedforward inhibitory mechanism (Crandall et al., 2015). Moreover, chemogenetic  
491 TRN inhibition degrades HD cell tuning. The rather small effect size may be explained by the only  
492 partial reduction of feedforward inhibition by CNO (see Fig. 4E). The anterodorsal TRN is thus  
493 part of the top-down circuit so far thought to innervate the ATN+ only monosynaptically (Dumont  
494 and Taube, 2015; Peyrache et al., 2017; Simonnet and Fricker, 2018; Perry and Mitchell, 2019).  
495 This result advances the mechanistic understanding of the proposed update of thalamic HD cell  
496 tuning by visual landmarks (Dumont and Taube, 2015). TRN-dependent inhibition may regulate  
497 single AD cells, for example through promoting bursting, which we also observe *in vitro*, although  
498 their existence *in vivo* has been questioned (Sheroziya and Timofeev, 2014). Bursting would  
499 increase their impact in upstream navigational circuits, in particular in the dPreS circuits  
500 (Peyrache et al., 2015), similar to what has been described for sensory thalamocortical circuits  
501 (Sherman, 2001). TRN-mediated burst promotion in some AD neurons coupled with inhibition of  
502 others could underlie the proposed increase in the precision of HD coding (Peyrache et al., 2015).  
503 TRN-driven ATN bursting might also be an important component in oscillatory patterns observed  
504 within ATN+, such as the one proposed to occur in AD (Peyrache et al., 2015; Peyrache et al.,  
505 2019) or in AV (Tsanov et al., 2011), which are probably relevant for linking spatial information to  
506 hippocampal memory processing.



507 To date, behavioral evidence for a role of the HD system in behavioral navigation is limited (Taube  
508 et al., 1992; van der Meer et al., 2010; Valerio and Taube, 2012; Butler et al., 2017) and the role  
509 of specific HD circuits, including dPreS and RSC, just starts to be behaviorally explored.  
510 Experimental effort typically targets egocentric strategies, for example by moving the MWM  
511 relative to landmarks between trials (Stackman et al., 2012), by studying navigation in darkness  
512 (Yoder et al., 2019) or by putting rats upside down (Calton and Taube, 2005). In contrast, the idea  
513 that spatial navigation requires an on-going switching between a range of possible strategies has  
514 not been much pursued, although it is known for human studies (Miniaci and De Leonibus, 2018).  
515 For example, a recent study using a hippocampus-specific synaptic knockout animal interpreted  
516 perseverant behavior at the platform location as a lack of forgetting (Awasthi et al., 2019), but the  
517 question of possible bias in navigational strategies was not addressed. Trajectory analysis in the  
518 MWM thus offers itself as an interesting approach to follow on the evolution of navigational  
519 behavior under well-controlled landmark conditions while simultaneously allowing egocentric  
520 strategies (Dolleman-van der Weel et al., 2009; Garthe and Kempermann, 2013). We found a  
521 preferential use of allocentric strategies when anterodorsal TRN was suppressed, suggesting that  
522 egocentric navigation was less efficient. This is reminiscent of an ATN lesion study (Stackman et  
523 al., 2012), although we cannot currently exclude that TRN-dependent inhibitory effects on nuclei  
524 other than ATN, such as on intralaminar nuclei (Dong et al., 2019), contribute. Anterodorsal TRN  
525 activity is required for qualitatively high HD signals in AD and/or for a robust activation of these  
526 by feedforward inhibition. Anterodorsal TRN activity seems to be critically required at moments  
527 when there is a mismatch between allocentric cues and new platform location, such that novel  
528 relations between external landmarks and self-perceived orientational strategies, which depend  
529 on HD cells, have to be built. Interestingly, the RSC has been proposed as an area involved in  
530 allocentric navigation and memory formation, but also in the switching between allo- and  
531 egocentric strategies to optimize navigational goals (Mitchell et al., 2018). In particular, its strong  
532 connections to limbic thalamus have been implied in the solving of spatial problems (Clark et al.,  
533 2018). Similar more complex roles in spatial navigation have recently been proposed for dPreS  
534 (Yoder et al., 2019), which has been primarily analyzed as part of the hierarchy of the egocentric  
535 coding system (Taube et al., 1990; Dumont and Taube, 2015; Peyrache et al., 2017). Our work  
536 does not currently disentangle between the distinct roles of these two brain areas. However, it  
537 has managed to pinpoint to the existence of a possibly fine switching mechanism at the interface  
538 between major allocentric and egocentric brain areas that, when perturbed, preserved overt  
539 navigational performance but compromised it at challenging moments that could pose existential  
540 threats.

541 This work integrates TRN function into the brain's balanced control of sensory-guided spatial  
542 navigation. The anterodorsal sector of TRN, located at the *limbus*, the 'edge' of the TRN, is a site  
543 of complex integration where navigational, attentional, motor and emotional information may be  
544 combined for precise activation of egocentric navigation systems. As a perspective arising from  
545 this work, we suggest that neuropsychological screening for egocentric navigation deficits may  
546 be useful in the diagnosis of disorders linked to TRN dysfunction, such as in neurodevelopmental  
547 disorders linked to attentional deficits (Krol et al., 2018) and in schizophrenia (Wilkins et al., 2017).

## 548 **Acknowledgements**

549 We thank Andreas Lüthi for providing training for the multiwire recordings, Adrien Peyrache for  
550 providing training for the silicone probes, Cyril Herry for helping with single unit sorting and  
551 analysis, Leonardo Restivo for helping with the design of the Morris water maze experiment and  
552 careful reading of the manuscript, Christian Lüscher for providing the VGAT-Ires-Cre mouse line,  
553 Desdemona Fricker, John Huguenard, Ralf Schneggenburger for constructive discussions,  
554 Simone Astori for critical reading of the manuscript, all lab members for constructive input for the  
555 manuscript and discussions in the course of the project.

556 Funding: GV received Travel Grants from the Jean Falk Vairant Foundation, Life Sciences  
557 Switzerland and Swiss Society for Neuroscience, ZR was supported by the Marie Heim Vögtlin  
558 Foundation, AG received an Erasmus Mobility Grant, AL was supported by Swiss National  
559 Science Foundation (Grant No. 31003A-166318 and 310030-184759) and Etat de Vaud.

## 560 **Author contributions**

561 GV carried out and analyzed all experimental tracing, *in vitro*, *in vivo* and behavioral data, and  
562 also contributed to the design of the *in vivo* and behavioral experiments. ZR gained first evidence  
563 for the anatomical connectivity between dPreS/RSC and anterodorsal TRN and initiated the *in*  
564 *vivo* unit recordings. RC wrote the Matlab code for the analysis of head-direction data and MWM  
565 Strategy. EB contributed to viral injections and the MWM experiments, GK to the antero- and  
566 retrograde tracing data. AG carried out the *in vitro* recordings in PV- and Sst-Cre mice. VP  
567 assisted with anatomical analysis. LMJF contributed to the surgery and analysis for *in vivo*  
568 experiments. AL supervised the project and wrote the manuscript with contribution of GV.

## 569 **Declaration of interests**

570 The authors declare no competing interests.

## 571 **STAR Methods**

### 572 **Animal husbandry and ethical approval**

573 We used mice of either sex from the C57BL6/J line and from the Slc32a1<sup>tm2(cre)<sup>Low</sup></sup> line, commonly  
574 referred to as VGAT-Ires-Cre line (Jackson Labs, generated by Dr. B. Lowell, Beth Israel  
575 Deaconess Medical Center, Harvard) (Vong et al., 2011), male  
576 C57Bl/6J;129P2\_Pvalbtm1(cre)Arbr/J mice, referred to here as PV-Cre mice, and male B6N.Cg-  
577 Sst<sup>tm2.1(cre)Zjh</sup>/J mice, referred to here as Sst-Cre mice. These three transgenic lines  
578 express the Cre-recombinase either in VGAT-, PV- or Sst-positive neurons, respectively. All  
579 animals were housed in a temperature and humidity-controlled animal house with a 12/12 h light-  
580 dark cycle (lights on at 9 a.m.) and water and food available *ad libitum*. The VGAT-Ires-Cre line  
581 was originally generated on a mixed C57BL/6;FVB;129S6 genetic background and backcrossed  
582 to C57BL6 ever since. PV-Cre and Sst-Cre lines were maintained on a C57BL6 background.  
583 VGAT-Ires-Cre and PV-Cre were used as homozygous, whereas the Sst-Cre mice were  
584 heterozygous. For anatomical tracing (retrograde and anterograde), mice (n = 24) were  
585 transferred into a housing room with similar conditions on the day prior to injection. They remained  
586 there for 7 days after injection before perfusion and tissue processing. For viral injections, mice  
587 were transferred into a P2 safety level housing with similar conditions on the day prior to the  
588 injection. They remained there 3 – 5 weeks before being used for *in vitro* electrophysiology (n =  
589 57), 2 – 3 weeks before surgical implantation for *in vivo* electrophysiology (n = 5), and 2 – 3 weeks  
590 before behavioral experiments (n = 24, only males). All experimental procedures complied with  
591 the Swiss National Institutional Guidelines on Animal Experimentation and were approved by the  
592 Swiss Cantonal Veterinary Office Committee for Animal Experimentation.

593

### 594 **Anatomical tracing and verification of recording and injection sites**

#### 595 **Retrograde tracing**

596 C57BL6/J mice, 4- 8-week-old, were anesthetized with 5 % isoflurane and fixed onto the  
597 stereotaxic frame. During the surgery, the anesthesia level was reduced to 1- 3 % and N<sub>2</sub>O was  
598 added if the surgery lasted > 1 h. Analgesia was ensured through Carprofen (5 mg/kg i.p.).  
599 Craniotomies were performed above the sites of injection at (anteroposterior (AP), mediolateral  
600 (ML), depth from cortical surface (DV), in stereotaxic coordinates from Bregma): -0.7, ±1.5, -3.1  
601 to target the anterodorsal TRN. Glass pipettes (5-000-1001-X, Drummond Scientific, Broomall,

602 PA) were pulled on a vertical puller (Narishige PP-830, Tokyo, Japan) and backfilled by capillarity  
603 with fluorescent latex microspheres (Red Retrobead™, Lumafluor). Using a Picospritzer III,  
604 pressurized air pulses (15 psi, 10 ms) were applied every 10 s for 10 min to inject the retrobeads.  
605 After 4 – 7 days, mice were perfused and their brains collected for immunostainings.

#### 606 Anterograde tracing

607 The anesthetic and surgical procedures were the same as the ones used for retrograde tracing.  
608 The coordinates of injection were (AP, ML, DV): -3.8, ±1.6, -1.0 for RSC, -3.8, ±2.3, -1.6 for PreS.  
609 Glass pipettes were backfilled by capillarity with the plant lectin anterograde tracer *Phaseolus*  
610 *vulgaris*-leucoagglutinin (PHAL-L, Vector Laboratories, Cat. No. L-1110). PHAL-L was chosen as  
611 it permits focal labeling with little spread, which seemed appropriate to target PreS and RSC as  
612 specifically as possible. A chlorinated silver wire was inserted into the pipette and a reference  
613 electrode attached to the mouse tail. The PHAL-L was electroporated with a 5- $\mu$ A current, 7 s  
614 on/off loop for 20 min, applied with a home-made current isolator and a Master-8 (Master-8 Pulse  
615 Stimulator, A.M.P.I., Jerusalem, Israel). After 5 – 7 days, mice were perfused and their brains  
616 collected for immunostainings.

#### 617 Perfusion and tissue processing

618 Mice were injected i.p. with a lethal dose of pentobarbital. Intracardial injection of ~45 ml of  
619 paraformaldehyde (PFA) 4 % was done at a rate of ~2.5 ml/min. Brains were post-fixed in PFA 4  
620 % for at least 24 h at 4°C. Brains were sliced with a Vibratome® (Microtome Leica VT1000 S,  
621 section thickness: 100  $\mu$ m, speed: 0.25-0.5 mm/s and knife sectioning frequency: 65 Hz) in 0.1 M  
622 phosphate buffer (PB). Brain sections were either directly mounted on slides or disposed in  
623 twelve-well plates filled with 0.1 M PB for immunohistochemistry.

#### 624 Immunofluorescent labeling

625 100  $\mu$ m-thick brain sections were washed 3 times in 0.1 M PB and transferred to a blocking  
626 solution containing 0.1 M PB, 0.3 % Triton, 2 % normal goat serum (NGS) for 30 min. The first  
627 antibody solutions also contained 0.1 M PB, 0.3 % Triton, 2 % NGS. For PHAL-L injected mice,  
628 we added 1:8000x of rabbit anti-PHAL-L (Vector Laboratories, AS-2300, RRID: AB\_2313686) and  
629 1:4000x of mouse anti-PV (Swant, PV235, RRID: AB\_10000343). For retrobead-injected and  
630 virally injected PV-Cre and Sst-Cre mice, we added 1:4000x of mouse anti-PV (Swant, PV235,  
631 RRID: AB\_10000343). Sections were kept at 4°C for 48 h on a shaking platform. After 3 washings  
632 in 0.1 M PB, we added a secondary antibody solution containing 0.1 M PB, 0.3 % Triton, 2 %



633 NGS and, when appropriate, 1:500x of goat anti-rabbit Cyanine Cy3<sup>TM</sup> (Jackson ImmunoResearch,  
634 111-165-003, RRID: AB\_2338000), 1:500x of goat anti-mouse Cy5<sup>TM</sup> Jackson ImmunoResearch,  
635 115-175-146, RRID: AB\_2338713) and/or 1:500x of goat anti-mouse Alexa Fluor® 488 (Jackson  
636 ImmunoResearch, 115-545-003, RRID: AB\_2338840). Sections were mounted on slides and  
637 covered with a mounting medium (Vectashield).

638 300 µm-thick brain sections obtained from patch-clamp recording sessions were post-fixed in 4  
639 % PFA for at least 24 h. Brain sections were washed 3x in 0.1 M PB and then pretreated with a  
640 solution containing 0.1 M PB and 1 % Triton for 30 min. The blocking solution was 0.1 M PB, 1 %  
641 Triton, 2 % NGS and was applied for 30 min. The first antibody solution contained 0.1 M PB, 1 %  
642 Triton, 2 % NGS, 1:4000x mouse anti-PV (Swant, PV235, RRID: AB\_10000343) and was applied  
643 for 5 days at 4°C. The secondary antibody solution contained 0.1 M PB, 0.3 % Triton, 2 % NGS,  
644 1:500x goat anti-mouse CY5, (Jackson ImmunoResearch, 115-175-146, RRID: AB\_2338713),  
645 1:8000x Streptavidin ALEXA594 (Jackson ImmunoResearch, 016-580-084, RRID: AB\_2337250)  
646 and was applied for 24 h at 4°C. Sections were mounted on slides and covered with a mounting  
647 medium (Vectashield).

#### 648 Microscopy

649 Electromicrographs of brain slices were taken with a fluorescent stereomicroscope (Nikon SMZ  
650 25) or a confocal microscope (Zeiss LSM 780 Quasar Confocal Microscope). NIS-Elements 4.5  
651 (Nikon), Adobe Photoshop CS5 and Zen lite 2012 were used to merge images from different  
652 channels.

653

#### 654 Viral injections

655 Mice 3- 5-week-old were anesthetized using Ketamine-Xylazine (83 and 3.5 mg/kg, respectively)  
656 and placed on a heating blanket to maintain the body temperature at 37°C. An initial dose of  
657 analgesic was administrated i.p. at the beginning of the surgery (Carprofen 5 mg/kg). The animal  
658 was head-fixed on a stereotactic apparatus equipped with an ear and mouth adaptor for young  
659 animals (Stoelting 51925, Wood Dale, IL). The bone was exposed at the desired injection site  
660 through a small skin incision. Viruses were injected with a thin glass pipette (5-000-1001-X,  
661 Drummond Scientific, Broomall, PA) pulled on a vertical puller (Narishige PP-830, Tokyo, Japan).  
662 C57BL6/J mice were injected bilaterally with a virus encoding ChR2 (500 nl of AAV1-hSyn-  
663 ChR2(H134R)\_eYFP-WPRE-hGH, 10<sup>12</sup> GC, ~100–200 nl/min) into the PreS (AP, ML, DV): -3.8,  
664 +/-2.5, -1.7. VGAT-Ires-Cre mice were injected bilaterally with 500 nl of AAV1-hSyn-

665 ChR2(H134R)\_eYFP-WPRE-hGH ( $1 \times 10^{12}$  GC, ~100–200 nl/min) into the PreS and/or unilaterally  
666 or bilaterally with a virus encoding DREADD-mCherry (500 nl of AAV8-hSyn-DIO-  
667 hM4D(Gi)\_mCherry,  $6.4 \times 10^{12}$  GC), or DREADD-IRES-mCitrine (500 nl of ssAAV8/2-hSyn1-dlox-  
668 A\_hM4D(Gi)\_IRES\_mCitrine-dlox-WPRE-hGHp(A),  $3.1 \times 10^{12}$  GC) or a control AAV8 encoding a  
669 DREADD-unrelated construct (500 nl of AAV8-hSyn-FLEX-Jaws\_KGC\_GFP\_ER2,  $3.2 \times 10^{12}$  GC)  
670 in the anterior sector of the TRN (AP, ML, DV: -0.8,  $\pm 1.35$ , -3.1). PV-Cre and Sst-Cre mice were  
671 injected into the anterior TRN (AP, ML, DV: -0.8,  $\pm 1.35$ , -3.1) with AAV1-EF1a-DIO-  
672 ChR2(H134R)\_eYFP-WPRE-hGH ( $1 \times 10^{12}$  GC, 500 nl, ~100–200 nl/min).

673

## 674 **In vitro electrophysiological recordings**

### 675 Slice preparation, solutions and recordings.

676 Brain slice preparation, storage and recordings were performed essentially as described  
677 (Fernandez et al., 2018). Adult 8- 10-week-old C57BL6/J and VGAT-Ires-Cre mice (3 – 4 weeks  
678 post viral injection) were briefly anesthetized with isoflurane and their brains quickly extracted.  
679 Acute 300- $\mu$ m-thick coronal brain slices were prepared in ice-cold oxygenated sucrose solution  
680 (which contained in mM: 66 NaCl, 2.5 KCl, 1.25  $\text{NaH}_2\text{PO}_4$ , 26  $\text{NaHCO}_3$ , 105 D(+)-saccharose, 27  
681 D(+)-glucose, 1.7 L(+)-ascorbic acid, 0.5  $\text{CaCl}_2$  and 7  $\text{MgCl}_2$ ), using a sliding vibratome (Histocom,  
682 Zug, Switzerland). Slices were kept for 30 min in a recovery solution at 35°C (in mM: 131 NaCl,  
683 2.5 KCl, 1.25  $\text{NaH}_2\text{PO}_4$ , 26  $\text{NaHCO}_3$ , 20 D(+)-glucose, 1.7 L(+)-ascorbic acid, 2  $\text{CaCl}_2$ , 1.2  $\text{MgCl}_2$ ,  
684 3 myo-inositol, 2 pyruvate) before being transferred to room temperature for at least 30 min before  
685 starting the recording. Slices were placed in the recording chamber of an upright microscope  
686 (Olympus BX50WI, Volketswil, Switzerland) and continuously perfused at room temperature with  
687 oxygenated ACSF containing (in mM): 131 NaCl, 2.5 KCl, 1.25  $\text{NaH}_2\text{PO}_4$ , 26  $\text{NaHCO}_3$ , 20 D(+)-  
688 glucose, 1.7 L(+)-ascorbic acid, 2  $\text{CaCl}_2$  and 1.2  $\text{MgCl}_2$ . This solution was supplemented in all  
689 experiments with 0.1 picrotoxin, 0.01 glycine, with picrotoxin removed for the recordings testing  
690 for feedforward inhibition (see Fig. 4). Borders of anterior TRN and ATN+ were visually identified  
691 in transillumination using a 10x water-immersion objective. Within a selected nucleus, cells were  
692 visualized through differential interference contrast optics a 40x water-immersion objective.  
693 Infrared images were acquired with an iXon Camera X2481 (Andor, Belfast, Northern Ireland).  
694 Cells were patched using borosilicate glass pipettes (TW150F-4) (World Precision Instruments,  
695 Sarasota, FL) pulled with a DMZ horizontal puller (Zeitz Instruments, Martinsried, Germany) to a  
696 final resistance of 2.5-5 M $\Omega$ . A  $\text{K}^+$ -based intracellular solution that contained (in mM) 140

697 KGluconate, 10 Hepes, 10 KCl, 0.1 EGTA, 10 phosphocreatine, 4 Mg-ATP, 0.4 Na-GTP, pH 7.3,  
698 290–305 mOsm, supplemented with ~2 mg/ml of neurobiotin (Vector Labs, Servion, Switzerland)  
699 was used for comparative measurements of the passive cellular properties (Fig. 2B,2C), for the  
700 cell-attached recordings (Fig. 3C) and for all current-clamp recordings (Fig. 3E). A Cs<sup>+</sup>-based  
701 intracellular solution containing (in mM) 127 CsGluconate, 10 Hepes, 2 CsBAPTA, 6 MgCl<sub>2</sub>, 10  
702 phosphocreatine, 2 Mg-ATP, 0.4 Na-GTP, 2 QX314-Cl, supplemented with ~2 mg/ml of  
703 neurobiotin, pH 7.3, 290–305 mOsm) was used with all the other voltage-clamp protocols. For  
704 these solutions, a liquid junction potential of -10 mV was taken into account for the current-clamp  
705 data. Signals were amplified using a Multiclamp 700B amplifier, digitized via a Digidata1322A and  
706 sampled at 10 kHz with Clampex10.2 (Molecular Devices, San José, CA).

### 707 Recording protocols, optogenetic stimulation and analysis.

708 Immediately after gaining whole-cell access, cell resistance ( $R_m$ ) and cell capacitance ( $C_m$ ) were  
709 measured in voltage-clamp at -60 mV through applying 500 ms-long, 10-20 mV hyperpolarizing  
710 steps (5 steps/cell). Then the recording was switched to current-clamp to measure the resting  
711 membrane potential (RMP). Squared somatic current injections (-50 to -300 pA for 500 ms, 4  
712 injections/cell) hyperpolarized neurons below -100 mV from membrane potentials between -50 to  
713 -60 mV and induced repetitive burst discharge in TRN neurons and single burst discharge in  
714 thalamic neurons (Fig. 2B, 2C). Squared current injections of increasing amplitude (step size, 50  
715 pA, 500 ms) were used to depolarize the neurons and generate tonic firing. Action potential  
716 properties were measured at the rheobase.

717 Whole-field blue LED (Cairn Res, Faversham, UK) stimulation (455 nm, duration: 0.1 to 1 ms,  
718 maximal light intensity 3.5 mW, 0.16 mW/mm<sup>2</sup>) in voltage-clamp (-60 mV) was used to assess the  
719 connectivity of TRN and ATN+ neurons through fibers arising from the PreS/RSC. EPSCs were  
720 elicited through single light pulses every 20 s, with a 5 mV hyperpolarizing step to control for the  
721 access resistance. After a stable baseline of > 2 min, drugs were applied in the bath (40 μM  
722 DNQX, 100 μM D,L-APV). To measure NMDA-components, the holding membrane potential was  
723 slowly brought to +40 mV where NMDAR-mediated currents were recorded for 2 min before bath-  
724 application of D,L-APV. Single light pulses were used in protocols to measure EPSC kinetics and  
725 pharmacological properties (Fig. 2D, 2E). The latency from LED onset, EPSC half-width and  
726 EPSC weighted decay time constant were measured with Clampfit 10.2. The effect of bath-  
727 application of 40 μM DNQX was measured once the reduction of EPSC amplitude reached a  
728 steady state. The NMDA/AMPA ratio was measured by dividing the amplitude of the EPSC at +40

729 mV in DNQX by the amplitude of the EPSC at -60 mV during the baseline and was expressed in  
730 percentage.

731 Minimal stimulation was achieved by progressively reducing the intensity of a single light pulse  
732 from its maximum (3.5 mW) to a level where only ~50 % of the stimuli induced a successful EPSC.  
733 The light intensity potentiometer allowing a limited graduation of light intensities, we could include  
734 only a few cells (n=12/50) in which this condition was achieved at  $0.28 \pm 0.05$  mW. In the case of  
735 LD neurons, which showed very high amplitude EPSCs with frequent escape currents, none of  
736 them reached the criterion to be included. Minimal stimulation was observed for light intensities  
737 averaging  $0.28 \pm 0.05$  mW, less than 10 % of the maximum. In a subset of cells (n=8), we slightly  
738 increased light intensity to  $0.40 \pm 0.08$  mW to verify whether failure rate decreased but the  
739 amplitude of successful responses was maintained. This was achieved in 5 cells in which failure  
740 rate decreased to 0 % but the amplitude of successes was  $109 \pm 4$  % of that found during minimal  
741 stimulation, whereas it increased to > 140 % in the remaining 3 cases. All successful EPSCs at  
742 minimal light stimulation were visually identified and measured in Clampfit10.2.

743 Cell-attached recordings of TRN cells (Fig. 3C) were achieved with recording pipettes of ~5 MΩ  
744 resistance, voltage-clamped at 0 mV and ~0 pA of holding current, while applying single light  
745 stimuli at varying light intensity (~100 stimuli/cell, one every 10 s). Whole-cell access was then  
746 established and cells held in current-clamp at their resting membrane potential. Single light  
747 stimulations with similar light intensities were given ~30 times for each cell every 10 s. The number  
748 of action currents/action potentials and the interspike interval (ISI) were manually measured on  
749 Clampfit10.2. The number of spikes was normalized to the maximum number evoked by the light  
750 stimulation. Data were grouped in bins of 0.25 mW of light (Fig. 3C3) and a sigmoidal fit was  
751 applied using Igor Pro 7 (WaveMetrics Inc., Lake Oswego, OR). The sigmoidal fit for cell-attached  
752 evoked spikes was  $= \frac{-78+160}{1+e^{-\frac{(x-0.18)}{0.32}}}$ . The sigmoid fit for whole-cell evoked spikes was  $= \frac{-142+232}{1+e^{-\frac{(x-0.2)}{0.73}}}$ .

753 Paired light stimulations at 1, 2, 5, 10 and 20 Hz were used to assess the short-term plasticity of  
754 PreS/RSC-TRN and PreS/RSC-ATN+ synapses. The paired pulse ration (PPR) was expressed  
755 as the ratio between the second and the first EPSC amplitude (Fig. 3D). Four responses were  
756 elicited for each frequency, with an interval of 20 s between each protocol. The amplitude of  
757 EPSCs was measured on the average trace in Clampfit10.2, and traces were not included if  
758 spontaneous currents appeared in between the paired stimuli.

759 For train stimulation, PreS-RSC afferents to TRN and ATN+ neurons were stimulated with 10 light  
760 pulses delivered 1/30 s at 2, 5, 8 and 10 Hz while cells were held at -50 to -60 mV in current-



761 clamp (Fig. 3E). Per stimulation frequency and cell, 5 responses were recorded and averaged.  
762 Responses were subdivided into sustained (Fig. 3E1) or entrained (Fig. 3E2) responses based  
763 on whether or not the first light pulse elicited an action potential. The number of action potentials  
764 generated by the train of stimulation was counted on Clampfit10.2. To quantify sustained and  
765 entrained responses, the number of action potentials during the 5 first stimulations was compared  
766 to the number of action potentials during the 5 last stimulations. In subthreshold responses, the  
767 amplitudes of the phasic responses were calculated from the point of positive inflection after a  
768 light stimulation to the next positive peak for each of the 10 subthreshold responses. The  
769 persistent depolarization was measured as the difference between the baseline value before the  
770 train of stimulation and the point of positive inflexion after each light stimulation. The mean  
771 persistent depolarization for the last 3 stimulations was used to quantify the steady state  
772 response.

773 To record feedforward inhibitory currents, using the Cs-based intracellular solution defined above,  
774 we studied single light-evoked EPSCs recorded in ATN+ cells at -60 mV (uncorrected for a 10  
775 mV junction potential). Then the membrane potential of the cell was slowly brought to +15 mV  
776 (uncorrected for a 10 mV junction potential). In 6 ATN+ cells, IPSCs were recorded for 4 min (12  
777 protocols, once every 20 s) for a baseline, then 10  $\mu$ M gabazine were bath-applied. The amplitude  
778 of the IPSCs in gabazine was measured at the steady state. A similar protocol was applied for 10  
779 ATN+ cells recorded in VGAT-Ires-Cre mice expressing the inhibitory DREADD in TRN cells.  
780 Instead of gabazine, 10  $\mu$ M CNO were bath-applied after the baseline recording of IPSCs.  
781 Measures of charge transfer were used to take into account the variable waveform of the IPSCs  
782 that were composed of multiple superimposed burst-like synaptic events.

783 To determine the connectivity of PV- and Sst-expressing TRN cells, brain slices were prepared  
784 from PV-Cre and Sst-Cre lines previously injected with ChR2-expressing virus (see above). Using  
785 identical recording and light stimulation conditions, evoked IPSCs were quantified in neurons  
786 recorded in the different thalamic nuclei AD, AV and LD.

## 787 **In vivo single-unit recordings and head-direction monitoring**

### 788 **Electrode and fiber preparation.**

789 Two types of recording configurations were used. Multi-wire electrodes were implanted for  
790 studying response properties of ATN+ to PreS/RSC stimulation. Silicon probes were used for  
791 identification and recording of HD-tuned units in combination with chemogenetic silencing of the  
792 anterodorsal TRN.

793 The multi-wire electrodes consisted of 16 individually insulated nichrome wires (13- $\mu$ m inner  
794 diameter, impedance 1 – 3 M $\Omega$ ; California Fine Wire) contained in a 26-gauge stainless steel  
795 guide canula. The wires were attached to a 16-pin connector (CON/16m-V-t, Omnetics) (Courtin  
796 et al., 2014), cut at a length of  $\sim$ 2 mm from the edge of the metal guiding tube and gold-plated  
797 using a nanoZ™ device (White Matter LLC, provided by Plexon Inc., Dallas, TX) to a final  
798 impedance of 50 – 100 k $\Omega$ . A silver wire (Warner Instr.) was soldered to the ground pin of the  
799 connector. Two animals were implanted with a single shank linear silicone probe (Neuronexus  
800 A1x16-5mm-50-703-Z16).

801 The optic fibers were built from a standard hard cladding multimode fiber (225  $\mu$ m outer diameter,  
802 Thorlabs, BFL37-2000/FT200EMT), inserted and glued (Heat-curable epoxy, Precision Fiber  
803 Products, ET-353ND-16OZ) to a multimode ceramic zirconia ferrule (Precision Fiber Products,  
804 MM-FER2007C-2300). The penetrating end was cut at the desired length ( $\sim$ 2 mm) with a Carbide-  
805 tip fiber optic scribe (Precision Fiber Products, M1-46124). The other end was polished with fiber-  
806 polishing films (Thorlabs). The optic fibers were connected to a PlexBright Optogenetic  
807 Stimulation System (Plexon) via home-made patch chord. The connection to the PlexBright Table-  
808 top LED Module (Wavelength 465 nm) was achieved through a Mini MM FC 900 $\mu$ m Connector  
809 (Precision Fiber Products, MM-CON2004-2300-14-BLK). The other end of the patch chord was  
810 inserted into a ceramic zirconia ferrule, fixed with glue and heat-shrinking tube (Allied Electronics,  
811 689-0267) and polished. Before the recording, the patch chord was attached to the implanted  
812 optic fiber via a ceramic split sleeve (Precision Fiber Products, SM-CS125S).

### 813 Surgery.

814 Virally injected C57BL6/J and VGAT-Ires-Cre mice were anesthetized with 5 % isoflurane, fixed  
815 on a stereotaxic frame and kept on a feedback-controlled heating pad (Phymep). The level of  
816 isoflurane was reduced along the surgery until 1 % and mixed with N<sub>2</sub>O. Craniotomies were  
817 opened above the PreS (AP, ML, DV: -3.8, +/-2.5, -1.7), the left ATN (AP, ML, DV: -0.8, +0.75, -  
818 2.8) and the lateral cerebellum with a microdrill (1/005 drill-size). The conjunctive tissue on the  
819 skull was removed with a scalpel and the skull was cleaned with iodine-based disinfectant. The  
820 skull was then scratched with the tip of the scalpel in a grid-like meshwork of grooves to improve  
821 the attachment of the glue (Loctite 401, Koenig). Multi-wire electrodes and linear silicone probes  
822 were lowered vertically, at approximately 10  $\mu$ m/s initially and then 1  $\mu$ m/s when reaching the ATN  
823 and glued to the skull. Optic fibers were lowered vertically above the PreS at similar rates. For  
824 the multi-wire electrodes, the ground silver wire was implanted at the surface of the lateral  
825 cerebellum. For silicone probes, the reference and ground wires were twisted together and

826 implanted at the surface of the lateral cerebellum. Carprofen (5 mg/kg, i.p.) and paracetamol (2  
827 mg/mL, drinking water) were provided during the peri-operative period. The mice were left in their  
828 home cage for a week to recover from the surgery and their weight, behavior and all aspects were  
829 monitored in score sheets established with the veterinary protocols. During this period, mice were  
830 also habituated to the handling and the recording cables.

### 831 Unit recordings and HD monitoring.

832 Mice were placed into a large cylindrical Plexiglas cage (diameter: 50 cm, height: 40 cm) where  
833 they could freely behave all along the recording sessions. The cage was positioned below a vision  
834 color camera inside a Faraday cage. Implanted animals were connected to the pre-amplifier PZ5-  
835 32 (Tucker-Davis Technologies (TDT)) via a ZIF-Clip Headstage adaptor (TDT, ZCA-OMN16) for  
836 the multi-wire electrodes and a ZIF-Clip Headstage (TDT) for the silicone probes. The camera  
837 was connected to a RV2 collection device (TDT) capable of tracking red and green LEDs mounted  
838 on the ZIF-Clip Headstage. The preamplifier was connected to a main amplifier RZ5D (TDT). The  
839 main computer (WS8, TDT) used the Real-time Processor Visual Design Studio (RPvdsEx) tool  
840 to design the recording sessions, activate light stimulation from the PlexBright Optogenetic  
841 Stimulation System (Plexon), and acquire the electrophysiological data from the headstage and  
842 tracking data from the camera.

843 For C57Bl6/J mice implanted with a multi-wire electrode, a recording session consisted in a 10 –  
844 20 min baseline recording followed by a 10 – 20 min recording with optogenetic activation of the  
845 PreS/RSC. The stimulation consisted in 300 – 600 light stimulations of 10 ms duration, one  
846 stimulation every 2 s. The intensity of the light ranged from 2 – 6 mW depending on the quality of  
847 the homemade optic fibers. For VGAT-Ires-Cre mice implanted with a silicone probe, a recording  
848 session consisted in a 10 – 20 min baseline recording, i.p. injection of CNO (1 – 2 mg/kg) or NaCl,  
849 40 min resting in homecage and 10 – 20 min test recording. The timing of the CNO injection is  
850 based on previous *in vivo* work using the same mouse line and CNO products, showing that the  
851 CNO effect peaked ~30 min post i.p. injection (Fernandez et al., 2018).

### 852 Spike sorting.

853 The Offline Sorter software (Plexon), Neuroexplorer (Nex Technologies) and MATLAB  
854 (MathWorks) were used to sort and analyze single-unit spikes. The waveforms were manually  
855 delineated in the two-dimensional space of principal components using their voltage features.  
856 Single units were defined as discrete clusters of waveforms in the principal component space,  
857 and did not contain spikes with a refractory period less than 1 ms. The quantification of the clusters

858 separation was further measured with multivariate ANOVA and J3 statistics. Cross-correlation  
859 analyses were used to control that a single unit was not recorded on multiple channels. Target  
860 units that had a peak of spike discharge when the reference unit fired were considered as  
861 duplicates and only one of the copy was used for analysis (Adapted from (Rozeske et al., 2018)).  
862 To compare the recordings during baseline and after injection of CNO, units were sorted with two  
863 different methods. At first, both recording sessions were manually sorted as described above  
864 while the experimenter was blind to the baseline/CNO condition. In a second step, the baseline  
865 sorting template was used for the CNO recording. Both methods gave similar results and only the  
866 manual sorted data are shown.

### 867 Unit analysis.

868 The discharge pattern of well-defined single units in the ATN+ was aligned to the optogenetic  
869 stimulation using peri-event raster plots and cumulative histogram (5 ms bins, starting 50 ms  
870 before LED onset and lasting 200 ms after LED onset, Neuroexplorer). The firing rate 50 ms  
871 before the LED onset was used as a baseline to calculate the Z-score of each bin as follow: =  
872  $\frac{\text{measured valued} - \text{baseline average}}{\text{baseline standard error}}$ . Z-scores were considered significant when  $> 1.96$  and  $< -1.96$ .  
873 Significant changes in the firing rate fell into 4 distinct classes depending on the direction of the  
874 change (increase or decrease firing) and the timing of the change.

875 Using a custom-made Matlab routine, the discharge patterns of ATN+ units were binned to the  
876 HD of the mice. The angles of direction were binned in  $6^\circ$ . The firing rate was averaged for each  
877 of the 60 portions of the circle. The length of the Rayleigh vector ( $r$ ) was calculated and units were  
878 considered as HD if  $r \geq 0.4$ , as head-modulated if  $0.2 \leq r < 0.4$  and as not tuned if  $r < 0.2$  (Yoder  
879 and Taube, 2009). The maximal firing rate, the width and the preferred direction were calculated  
880 for HD units. The width of the tuning curve was measured as the span of the angle between the  
881 two directions for which the firing rate was equal to 50 % of the maximal firing rate at the preferred  
882 direction (Blair and Sharp, 1995).

883



## 884 **Behavioral experiment**

### 885 Recording.

886 One week before the beginning of the behavioral task, VGAT-Ires-Cre mice expressing either an  
887 inhibitory DREADD (DREADD mice) or a non DREADD-related (control mice) construct into the  
888 anterodorsal TRN were habituated to the handling and i.p. injection. Naïve VGAT-Ires-Cre male  
889 mice were trained to find a 12 cm wide circular platform submerged 0.5 – 0.8 cm below the surface  
890 in a 150 cm diameter circular pool filled with white opaque water at  $23\pm 1^\circ\text{C}$ . Mice were trained in  
891 daily sessions composed of 4 consecutive trials, with a 60 s probe session without the platform  
892 preceding the first trial session every odd days. A trial ended when the mice spent 5 s onto the  
893 platform. Mice were left 10 s more before being placed below a heating lamp before the next trial,  
894 10 – 15 s later. Four shapes around the pool (cross, horizontal stripes, vertical stripes, coffee  
895 grain) served as visual cues and were placed in the SW, NW, NE, SE corner of the room  
896 respectively. If the mouse failed to find the platform after 60 s, the experimenter guided it to the  
897 platform where it was left for 15 s. Mice were placed in the pool facing the wall. The position of  
898 pool entry was randomly shuffled every day between NE, SE, NW and NE. During a 60 s probe  
899 session, the platform was removed and mice were released from the wall of the quadrant opposite  
900 to the target one. The experimenter was blind to the condition of the mice (control or DREADD).  
901 The session duration (between the first and the last animal) was ~2 hours, the first trial starting at  
902 Zeitgeber time 0 + 1.5 h. Daily i.p. injection of CNO (1 – 2 mg/kg) were performed 40 min before  
903 the beginning of the session. The timing of the CNO injection is based on previous *in vivo* work  
904 using the same mouse line and CNO products, showing that the CNO effect peaked ~30 min post  
905 i.p. injection (Fernandez et al., 2018).

### 906 Analysis and automatic strategy detection.

907 The video tracking data were analyzed using EthoVisionXT14 (Noldus) to quantify the average  
908 swimming speed, escape latency, proximity (mean distance of all the tracked points of the path  
909 to the platform center), percentage time spent in target quadrant and platform crossings.  
910 Heatmaps were generated by superimposing all the path points of every mouse in a group.  
911 Heatmaps were linearly scaled using the global minimum and maximum for both groups to allow  
912 comparison between the two. To attribute a specific strategy to each MWM trial, we used a  
913 homemade matlab algorithm based on (Garthe et al., 2009). For each trial, the animal path in the  
914 MWM was extracted as timed-tagged x and y coordinates from which specific variables were  
915 computed in order to take a decision. The 8 strategies are described in Suppl. Fig. 5 and the

916 decision was made in the following sequential order with the 4 allocentric strategies first followed  
917 by the 4 egocentric strategies: 1-Direct swimming; if 95 % of the time-points are spent in the goal  
918 cone (isosceles triangle with its height going from starting point to goal platform with an origin  
919 angle of 40°). 2-Focal search; if the mean distance of the path to its centroid (MDTC) was inferior  
920 to 35 % standard unit (STDU) corresponding to the radius of the MWM, and the mean distance  
921 to the edge of the goal platform was inferior to 30% STDU. 3-directed search; if total time spent  
922 in the goal cone was superior to 80 %. 4-perseverance; if the MDTC was inferior to 45 % STDU  
923 and the mean distance to the previous platform edge was inferior to 40 % STDU. In our case, the  
924 perseverance strategy was only possible after day 10, during the reversal learning period. 5-  
925 chaining; if the time spent in the annulus zone (spanning from 33 to 70 % STDU) was superior to  
926 80 %. 6-scanning; if the total coverage of the MWM (the pool was divided in 15 cm squares and  
927 the coverage was obtained as the ratio of crossed squares over the total number of squares) was  
928 superior to 10% and inferior to 60 %, and the mean distance of the path to the center of the MWM  
929 was inferior to 70% STDU. 7-thigmotaxis; if the time spent in the closer wall zone (spanning from  
930 87 % STDU to the edge of the MWM) was superior to 35 % and the time spend in the wider wall  
931 zone (spanning from 70 % STDU to the edge of the MWM) was superior to 65 %. 8-random  
932 search; if the total coverage of the MWM was superior to 60 %. If none the conditions could be  
933 met in this order, no strategy were attributed.

### 934 **Statistics**

935 All tests were done using R programming software (2.15.0, R Core Team, The R Foundation for  
936 Statistical Computing ([www.rproject.org/foundation](http://www.rproject.org/foundation)), 2007]. The normality of the data sets was  
937 assessed using Shapiro-Wilk normality test. Comparison of two data sets were done using  
938 Student's *t* test and paired Student's *t* test, for non-repeated and repeated measures respectively,  
939 or their non-parametric equivalent, Mann-Whitney U test and Wilcoxon signed rank-test. Chi-  
940 square tests were used to assess whether the swimming region of mice during probe sessions of  
941 the MWM were different from the expected frequencies and the proportion of strategies used  
942 between mouse groups. 1-way/2-way (non-)repeated measure ANOVAs followed by post hoc *t*  
943 tests were used when necessary on normally distributed data sets whereas non-normally  
944 distributed data were analyzed directly with the post hoc tests. A Bonferroni correction was  
945 applied when more than two comparisons were done on the same data set and the new alpha  
946 threshold is indicated. All statistical tests are specifically indicated in the figure legends if they are  
947 not given in the main text.

948

## 949 **References**

- 950 Ahrens S, Jaramillo S, Yu K, Ghosh S, Hwang GR, Paik R, Lai C, He M, Huang ZJ, Li B (2015) ErbB4 regulation  
951 of a thalamic reticular nucleus circuit for sensory selection. *Nat Neurosci* 18:104-111.
- 952 Astori S, Lüthi A (2013) Synaptic plasticity at intrathalamic connections via Ca<sub>v</sub>3.3 T-type Ca<sup>2+</sup> channels and  
953 GluN2B-containing NMDA receptors. *J Neurosci* 33:624-630.
- 954 Awasthi A, Ramachandran B, Ahmed S, Benito E, Shinoda Y, Nitzan N, Heukamp A, Rannio S, Martens H,  
955 Barth J, Burk K, Wang YT, Fischer A, Dean C (2019) Synaptotagmin-3 drives AMPA receptor  
956 endocytosis, depression of synapse strength, and forgetting. *Science* 363.
- 957 Blair HT, Sharp PE (1995) Anticipatory head direction signals in anterior thalamus: evidence for a  
958 thalamocortical circuit that integrates angular head motion to compute head direction. *J Neurosci*  
959 15:6260-6270.
- 960 Bubb EJ, Kinnavane L, Aggleton JP (2017) Hippocampal - diencephalic - cingulate networks for memory  
961 and emotion: An anatomical guide. *Brain Neurosci Adv* 1.
- 962 Butler WN, Smith KS, van der Meer MAA, Taube JS (2017) The head-direction signal plays a functional role  
963 as a neural compass during navigation. *Curr Biol* 27:2406.
- 964 Calton JL, Taube JS (2005) Degradation of head direction cell activity during inverted locomotion. *J*  
965 *Neurosci* 25:2420-2428.
- 966 Castro-Alamancos MA, Calcagnotto ME (1999) Presynaptic long-term potentiation in corticothalamic  
967 synapses. *J Neurosci* 19:9090-9097.
- 968 Clark BJ, Bassett JP, Wang SS, Taube JS (2010) Impaired head direction cell representation in the  
969 anterodorsal thalamus after lesions of the retrosplenial cortex. *J Neurosci* 30:5289-5302.
- 970 Clark BJ, Simmons CM, Berkowitz LE, Wilber AA (2018) The retrosplenial-parietal network and reference  
971 frame coordination for spatial navigation. *Behav Neurosci* 132:416-429.
- 972 Clemente-Perez A, Makinson SR, Higashikubo B, Brovarney S, Cho FS, Urry A, Holden SS, Wimer M, David  
973 C, Fenno LE, Acsády L, Deisseroth K, Paz JT (2017) Distinct thalamic reticular cell types differentially  
974 modulate normal and pathological cortical rhythms. *Cell Rep* 19:2130-2142.
- 975 Cornwall J, Cooper JD, Phillipson OT (1990) Projections to the rostral reticular thalamic nucleus in the rat.  
976 *Exp Brain Res* 80:157-171.
- 977 Courtin J, Chaudun F, Rozeske RR, Karalis N, Gonzalez-Campo C, Wurtz H, Abdi A, Baufreton J, Bienvenu  
978 TC, Herry C (2014) Prefrontal parvalbumin interneurons shape neuronal activity to drive fear  
979 expression. *Nature* 505:92-96.
- 980 Crabtree JW (2018) Functional diversity of thalamic reticular subnetworks. *Front Syst Neurosci* 12:41.
- 981 Crandall SR, Cruikshank SJ, Connors BW (2015) A corticothalamic switch: controlling the thalamus with  
982 dynamic synapses. *Neuron* 86:768-782.
- 983 Cruikshank SJ, Urabe H, Nurmikko AV, Connors BW (2010) Pathway-specific feedforward circuits between  
984 thalamus and neocortex revealed by selective optical stimulation of axons. *Neuron* 65:230-245.
- 985 Ding SL (2013) Comparative anatomy of the prosubiculum, subiculum, presubiculum, postsubiculum, and  
986 parasubiculum in human, monkey, and rodent. *J Comp Neurol* 521:4145-4162.
- 987 Dolleman-van der Weel MJ, Morris RG, Witter MP (2009) Neurotoxic lesions of the thalamic reuniens or  
988 mediodorsal nucleus in rats affect non-mnemonic aspects of watermaze learning. *Brain Struct*  
989 *Funct* 213:329-342.
- 990 Dong P, Wang H, Shen XF, Jiang P, Zhu XT, Li Y, Gao JH, Lin S, Huang Y, He XB, Xu FQ, Duan S, Lian H, Wang  
991 H, Chen J, Li XM (2019) A novel cortico-intrathalamic circuit for flight behavior. *Nat Neurosci*  
992 22:941-949.
- 993 Dumont JR, Taube JS (2015) The neural correlates of navigation beyond the hippocampus. *Prog Brain Res*  
994 219:83-102.

- 995 Fernandez LM, Vantomme G, Osorio-Forero A, Cardis R, Béard E, Lüthi A (2018) Thalamic reticular control  
996 of local sleep in mouse sensory cortex. *Elife* 7.
- 997 Fernandez LMJ, Pellegrini C, Vantomme G, Béard E, Lüthi A, Astori S (2017) Cortical afferents onto the  
998 nucleus Reticularis thalami promote plasticity of low-threshold excitability through GluN2C-  
999 NMDARs. *Sci Rep* 7:12271.
- 1000 Garthe A, Kempermann G (2013) An old test for new neurons: refining the Morris water maze to study  
1001 the functional relevance of adult hippocampal neurogenesis. *Front Neurosci* 7:63.
- 1002 Gentet LJ, Ulrich D (2004) Electrophysiological characterization of synaptic connections between layer VI  
1003 cortical cells and neurons of the nucleus reticularis thalami in juvenile rats. *Eur J Neurosci* 19:625-  
1004 633.
- 1005 Gjoni E, Zenke F, Bouhours B, Schneggenburger R (2018) Specific synaptic input strengths determine the  
1006 computational properties of excitation-inhibition integration in a sound localization circuit. *J*  
1007 *Physiol* 596:4945-4967.
- 1008 Golshani P, Liu XB, Jones EG (2001) Differences in quantal amplitude reflect GluR4- subunit number at  
1009 corticothalamic synapses on two populations of thalamic neurons. *Proc Natl Acad Sci U S A*  
1010 98:4172-4177.
- 1011 Gonzalo-Ruiz A, Lieberman AR (1995a) Topographic organization of projections from the thalamic reticular  
1012 nucleus to the anterior thalamic nuclei in the rat. *Brain Res Bull* 37:17-35.
- 1013 Gonzalo-Ruiz A, Lieberman AR (1995b) GABAergic projections from the thalamic reticular nucleus to the  
1014 anteroventral and anterodorsal thalamic nuclei of the rat. *J Chem Neuroanat* 9:165-174.
- 1015 Goodridge JP, Taube JS (1997) Interaction between the postsubiculum and anterior thalamus in the  
1016 generation of head direction cell activity. *J Neurosci* 17:9315-9330.
- 1017 Halassa MM, Chen Z, Wimmer RD, Brunetti PM, Zhao S, Zikopoulos B, Wang F, Brown EN, Wilson MA  
1018 (2014) State-dependent architecture of thalamic reticular subnetworks. *Cell* 158:808-821.
- 1019 Herrera CG, Cadavieco MC, Jago S, Ponomarenko A, Korotkova T, Adamantidis A (2016) Hypothalamic  
1020 feed-forward inhibition of thalamocortical network controls arousal and consciousness. *Nat*  
1021 *Neurosci* 19:290-298.
- 1022 Huguenard JR (1996) Low-threshold calcium currents in central nervous system neurons. *Annu Rev Physiol*  
1023 58:329-348.
- 1024 Krol A, Wimmer RD, Halassa MM, Feng G (2018) Thalamic reticular dysfunction as a circuit endophenotype  
1025 in neurodevelopmental disorders. *Neuron* 98:282-295.
- 1026 Krout KE, Loewy AD, Westby GW, Redgrave P (2001) Superior colliculus projections to midline and  
1027 intralaminar thalamic nuclei of the rat. *J Comp Neurol* 431:198-216.
- 1028 Le Masson G, Renaud-Le Masson S, Debay D, Bal T (2002) Feedback inhibition controls spike transfer in  
1029 hybrid thalamic circuits. *Nature* 417:854-858.
- 1030 Lee SM, Friedberg MH, Ebner FF (1994) The role of GABA-mediated inhibition in the rat ventral posterior  
1031 medial thalamus. II. Differential effects of GABAA and GABAB receptor antagonists on responses  
1032 of VPM neurons. *J Neurophysiol* 71:1716-1726.
- 1033 Lozsádi DA (1994) Organization of cortical afferents to the rostral, limbic sector of the rat thalamic  
1034 reticular nucleus. *J Comp Neurol* 341:520-533.
- 1035 Lozsádi DA (1995) Organization of connections between the thalamic reticular and the anterior thalamic  
1036 nuclei in the rat. *J Comp Neurol* 358:233-246.
- 1037 Miniaci MC, De Leonibus E (2018) Missing the egocentric spatial reference: a blank on the map. *F1000Res*  
1038 7:168.
- 1039 Mitchell AS, Czajkowski R, Zhang N, Jeffery K, Nelson AJD (2018) Retrosplenial cortex and its role in spatial  
1040 cognition. *Brain Neurosci Adv* 2:2398212818757098.
- 1041 Paré D, Steriade M, Deschênes M, Oakson G (1987) Physiological characteristics of anterior thalamic  
1042 nuclei, a group devoid of inputs from reticular thalamic nucleus. *J Neurophysiol* 57:1669-1685.



- 1043 Perry BAL, Mitchell AS (2019) Considering the evidence for anterior and laterodorsal thalamic nuclei as  
1044 higher order relays to cortex. *Front Mol Neurosci* 12:167.
- 1045 Peyrache A, Schieferstein N, Buzsáki G (2017) Transformation of the head-direction signal into a spatial  
1046 code. *Nat Commun* 8:1752.
- 1047 Peyrache A, Lacroix MM, Petersen PC, Buzsáki G (2015) Internally organized mechanisms of the head  
1048 direction sense. *Nat Neurosci* 18:569-575.
- 1049 Peyrache A, Duszkiwicz AJ, Viejo G, Angeles-Duran S (2019) Thalamocortical processing of the head-  
1050 direction sense. *Prog Neurobiol*:101693.
- 1051 Pinault D (2004) The thalamic reticular nucleus: structure, function and concept. *Brain Res Brain Res Rev*  
1052 46:1-31.
- 1053 Pinault D, Deschênes M (1998) Projection and innervation patterns of individual thalamic reticular axons  
1054 in the thalamus of the adult rat: a three-dimensional, graphic, and morphometric analysis. *J Comp*  
1055 *Neurol* 391:180-203.
- 1056 Rogers J, Churilov L, Hannan AJ, Renoir T (2017) Search strategy selection in the Morris water maze  
1057 indicates allocentric map formation during learning that underpins spatial memory formation.  
1058 *Neurobiol Learn Mem* 139:37-49.
- 1059 Rozeske RR, Jercog D, Karalis N, Chaudun F, Khoder S, Girard D, Winke N, Herry C (2018) Prefrontal-  
1060 periaqueductal gray-projecting neurons mediate context fear discrimination. *Neuron* 97:898-910  
1061 e896.
- 1062 Scheibel ME, Scheibel AB (1966) The organization of the nucleus reticularis thalami: a Golgi study. *Brain*  
1063 *Res* 1:43-62.
- 1064 Sherman SM (2001) Thalamic relay functions. *Prog Brain Res* 134:51-69.
- 1065 Sherman SM (2017) Functioning of circuits connecting thalamus and cortex. *Compr Physiol* 7:713-739.
- 1066 Sherman SM, Guillery RW (1998) On the actions that one nerve cell can have on another: distinguishing  
1067 "drivers" from "modulators". *Proc Natl Acad Sci U S A* 95:7121-7126.
- 1068 Sheroziya M, Timofeev I (2014) Global intracellular slow-wave dynamics of the thalamocortical system. *J*  
1069 *Neurosci* 34:8875-8893.
- 1070 Simonnet J, Fricker D (2018) Cellular components and circuitry of the presubiculum and its functional role  
1071 in the head direction system. *Cell Tissue Res* 373:541-556.
- 1072 Soto-Sánchez C, Wang X, Vaingankar V, Sommer FT, Hirsch JA (2017) Spatial scale of receptive fields in the  
1073 visual sector of the cat thalamic reticular nucleus. *Nat Commun* 8:800.
- 1074 Stackman RW, Jr., Lora JC, Williams SB (2012) Directional responding of C57BL/6J mice in the Morris water  
1075 maze is influenced by visual and vestibular cues and is dependent on the anterior thalamic nuclei.  
1076 *J Neurosci* 32:10211-10225.
- 1077 Taube JS (1995) Head direction cells recorded in the anterior thalamic nuclei of freely moving rats. *J*  
1078 *Neurosci* 15:70-86.
- 1079 Taube JS, Muller RU, Ranck JB, Jr. (1990) Head-direction cells recorded from the postsubiculum in freely  
1080 moving rats. I. Description and quantitative analysis. *J Neurosci* 10:420-435.
- 1081 Taube JS, Kesslak JP, Cotman CW (1992) Lesions of the rat postsubiculum impair performance on spatial  
1082 tasks. *Behav Neural Biol* 57:131-143.
- 1083 Tsanov M, Chah E, Vann SD, Reilly RB, Erichsen JT, Aggleton JP, O'Mara SM (2011) Theta-modulated head  
1084 direction cells in the rat anterior thalamus. *J Neurosci* 31:9489-9502.
- 1085 Usrey WM, Sherman SM (2019) Corticofugal circuits: Communication lines from the cortex to the rest of  
1086 the brain. *J Comp Neurol* 527:640-650.
- 1087 Valerio S, Taube JS (2012) Path integration: how the head direction signal maintains and corrects spatial  
1088 orientation. *Nat Neurosci* 15:1445-1453.
- 1089 van der Meer MAA, Richmond Z, Braga RM, Wood ER, Dudchenko PA (2010) Evidence for the use of an  
1090 internal sense of direction in homing. *Behav Neurosci* 124:164-169.

- 1091 van Groen T, Wyss JM (1990) The postsubicular cortex in the rat: characterization of the fourth region of  
1092 the subicular cortex and its connections. *Brain Res* 529:165-177.
- 1093 Vantomme G, Osorio-Forero A, Lüthi A, Fernandez LMJ (2019) Regulation of local sleep by the thalamic  
1094 reticular nucleus. *Front Neurosci* 13:576.
- 1095 Vong L, Ye C, Yang Z, Choi B, Chua S, Jr., Lowell BB (2011) Leptin action on GABAergic neurons prevents  
1096 obesity and reduces inhibitory tone to POMC neurons. *Neuron* 71:142-154.
- 1097 Weese GD, Phillips JM, Brown VJ (1999) Attentional orienting is impaired by unilateral lesions of the  
1098 thalamic reticular nucleus in the rat. *J Neurosci* 19:10135-10139.
- 1099 Wilkins LK, Girard TA, Herdman KA, Christensen BK, King J, Kiang M, Bohbot VD (2017) Hippocampal  
1100 activation and memory performance in schizophrenia depend on strategy use in a virtual maze.  
1101 *Psychiatry Res Neuroimaging* 268:1-8.
- 1102 Wimmer RD, Schmitt LI, Davidson TJ, Nakajima M, Deisseroth K, Halassa MM (2015) Thalamic control of  
1103 sensory selection in divided attention. *Nature* 526:705-709.
- 1104 Wright NF, Erichsen JT, Vann SD, O'Mara SM, Aggleton JP (2010) Parallel but separate inputs from limbic  
1105 cortices to the mammillary bodies and anterior thalamic nuclei in the rat. *J Comp Neurol*  
1106 518:2334-2354.
- 1107 Yoder RM, Taube JS (2009) Head direction cell activity in mice: robust directional signal depends on intact  
1108 otolith organs. *J Neurosci* 29:1061-1076.
- 1109 Yoder RM, Valerio S, Crego ACG, Clark BJ, Taube JS (2019) Bilateral postsubiculum lesions impair visual  
1110 and nonvisual homing performance in rats. *Behav Neurosci* 133:496-507.
- 1111 Zikopoulos B, Barbas H (2007) Circuits for multisensory integration and attentional modulation through  
1112 the prefrontal cortex and the thalamic reticular nucleus in primates. *Rev Neurosci* 18:417-438.
- 1113 Zikopoulos B, Barbas H (2012) Pathways for emotions and attention converge on the thalamic reticular  
1114 nucleus in primates. *J Neurosci* 32:5338-5350.
- 1115
